# Supplementary material
Source: PubMed Central journal article supplement (PMC8595897)
Supplement: mmc1.pdf [file mmc1.pdf]

**The American Journal of Human Genetics, Volume 108**

**Supplemental information**

**Revisiting the out of Africa event  
with a deep-learning approach**

**Francesco Montinaro, Vasili Pankratov, Burak Yelmen, Luca Pagani, and Mayukh Mondal**

# Supplementary Figures

Figure S1: Schematic for used TensorFlow model.

a) Model Selection and b) Parameter Estimation. “?” marks the number of rows which can be variable depending on the simulation and input files. The number denotes the number of elements for input and output per simulation.

a)

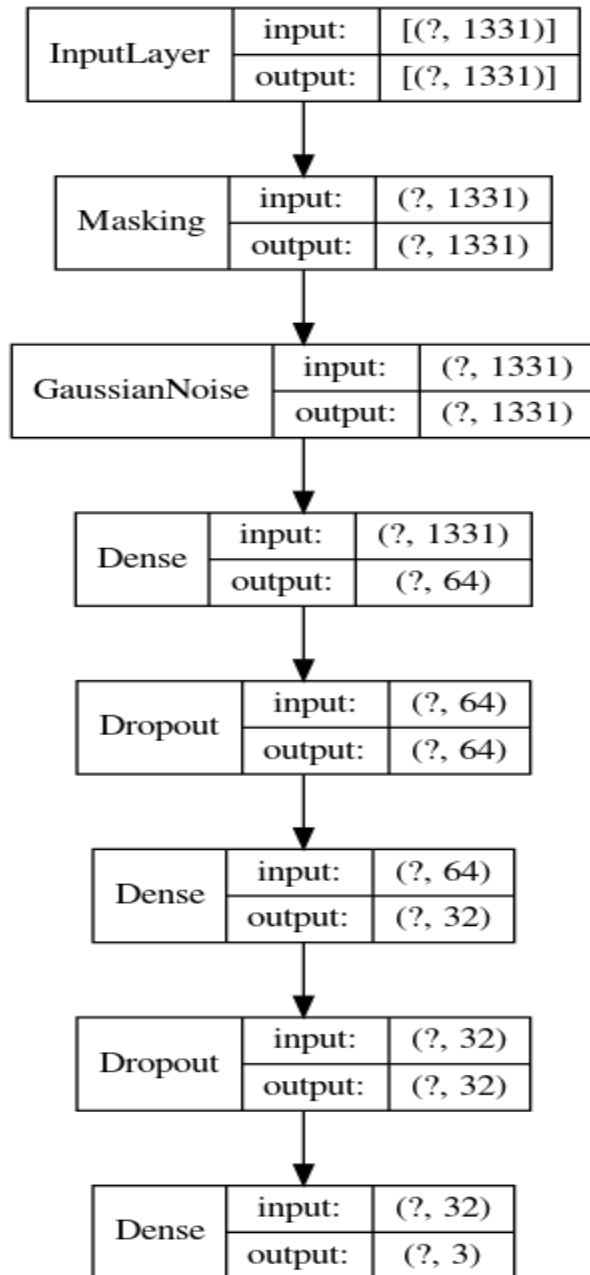

b)

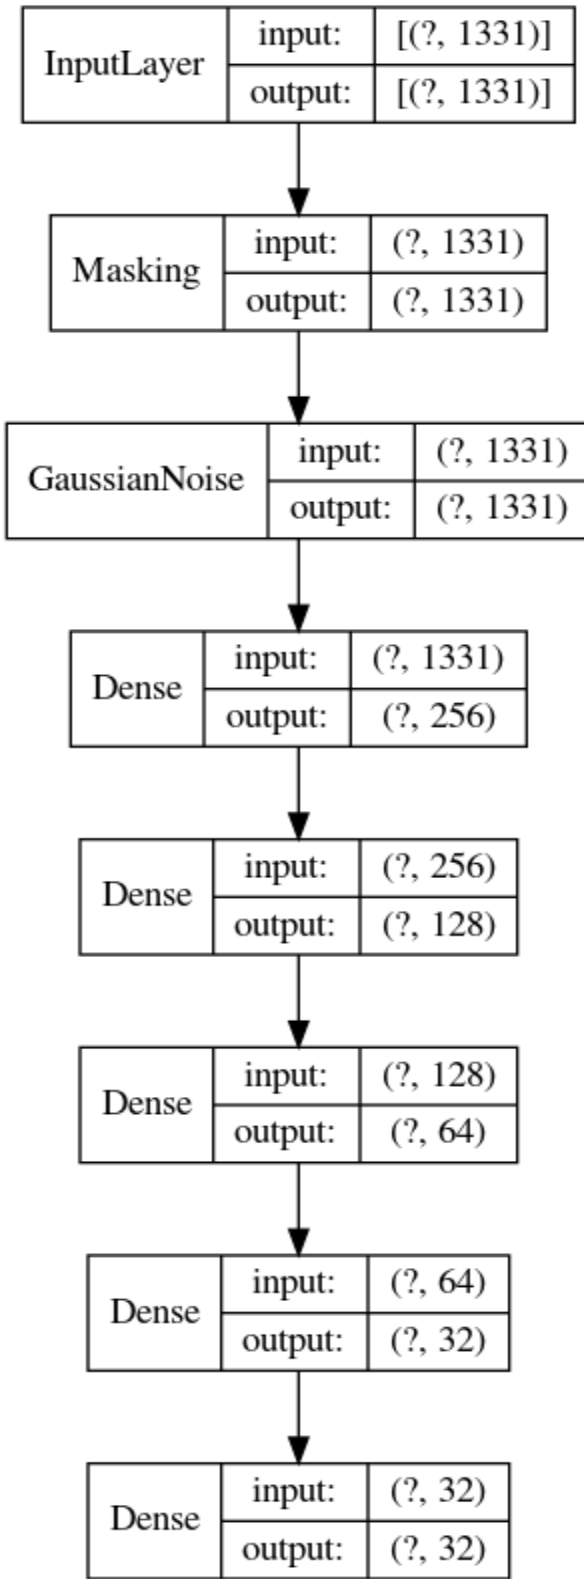

Figure S2: Flowchart of individual ABC-DLS method

a) Model Selection by DL, b) Param Prediction by DL c) SMC

a)

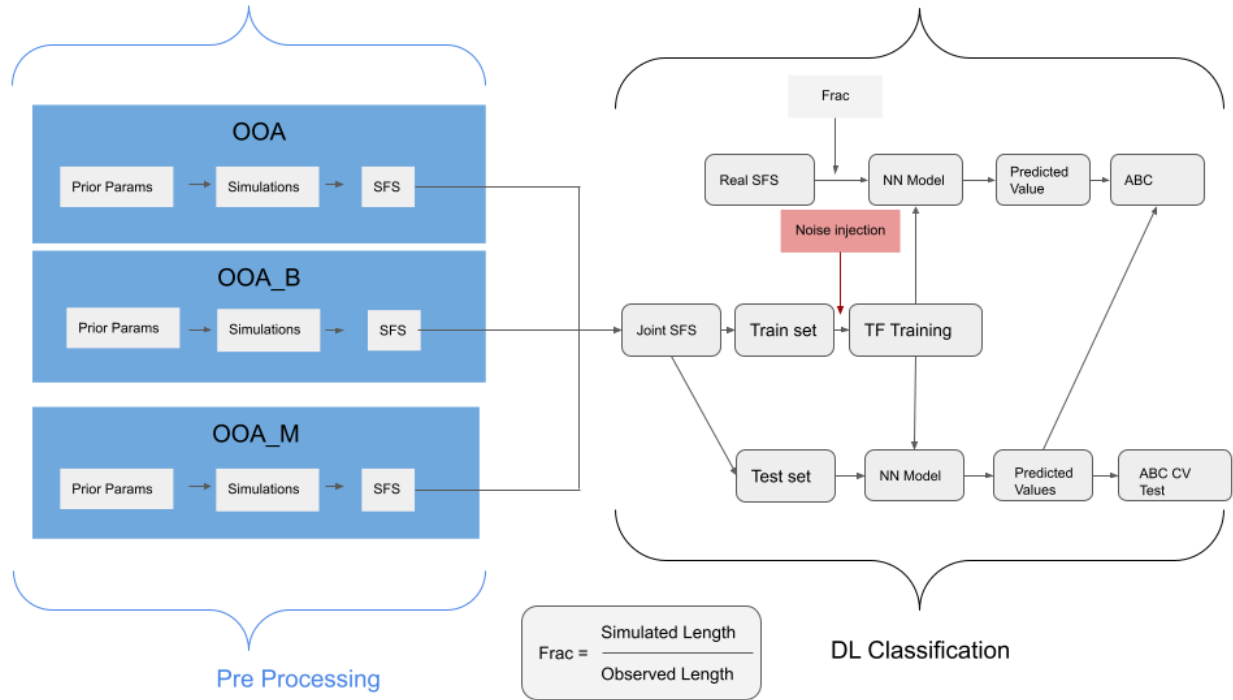

b)

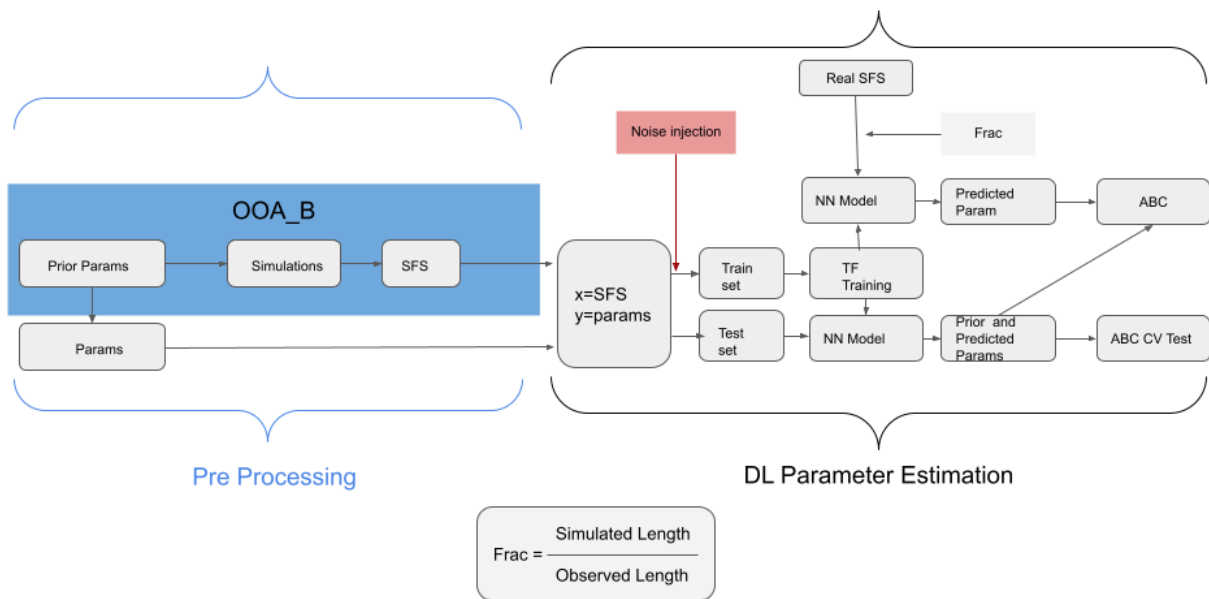

c)

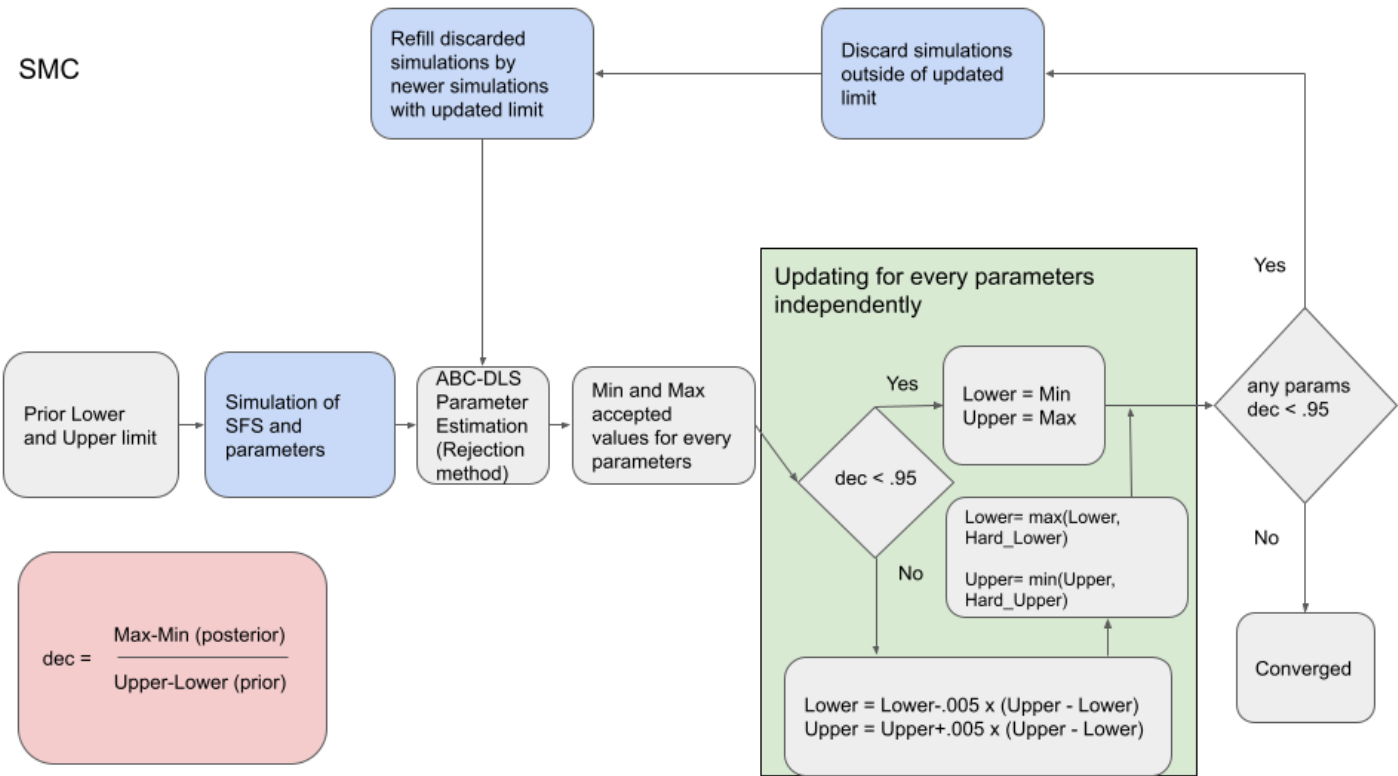

Figure S3: Flowchart for the ABC-DLS methods interacting together to get desired results

a) Parameter Estimation using DLS b) Model Selection using DLS

a)

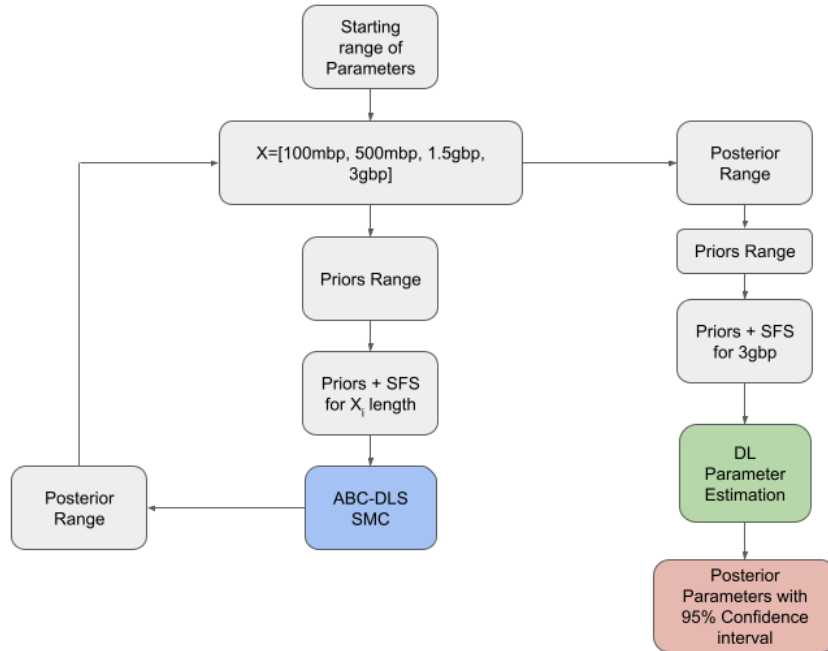

b)

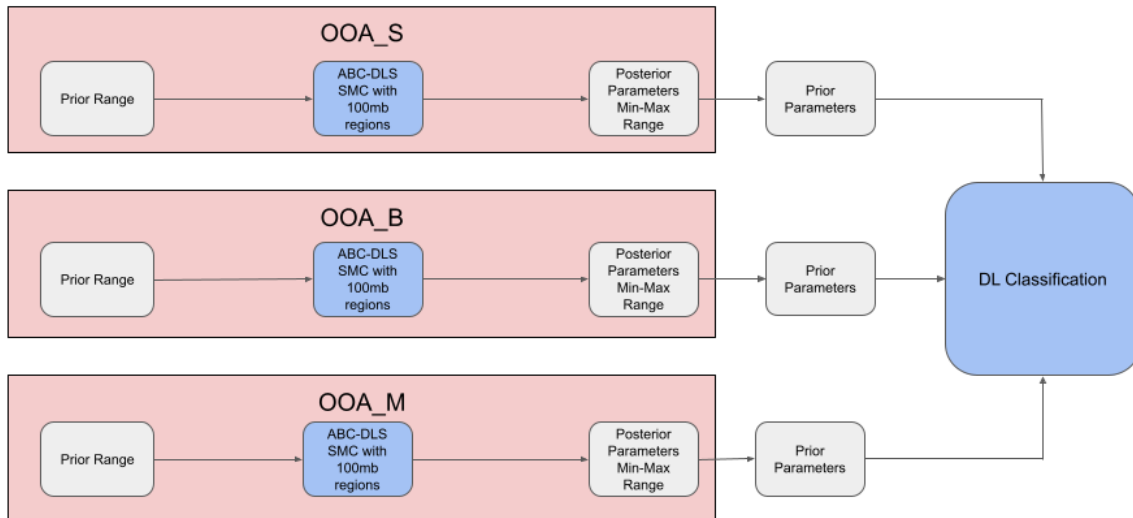

Figure S4: Comparison between mutation age estimate coming from relate between the simulation and real data.

two-dimensional mutation tMRCA distributions for the real data (a-c) as well as for the three simulation scenarios BNDX, MNDX and SNDX (d-f, g-i and j-l respectively). The tMRCAs are  $\log_{10}$  transformed. Each pixel represents a class of mutations with a given combination of age in population A (x axis) and population b (y axis) with the colour showing the number of mutations in each class.

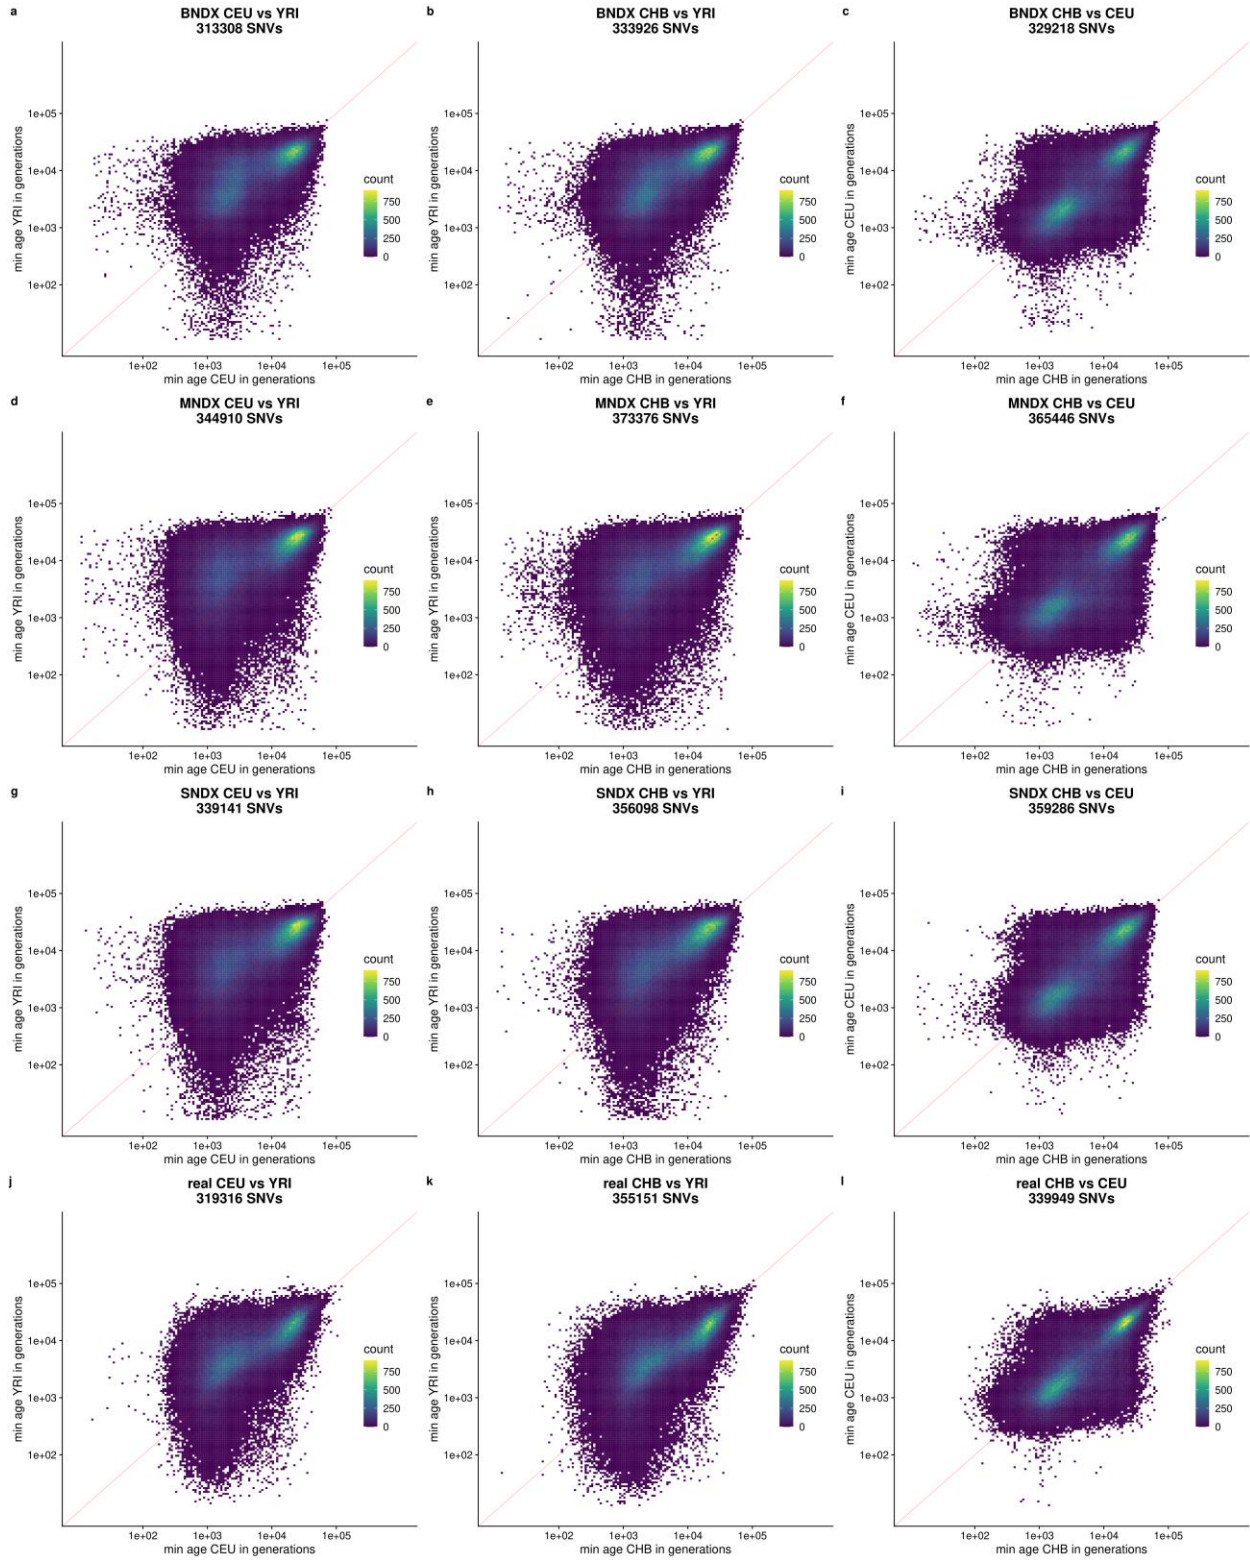



Figure S5: Comparison between mutation age estimate coming from relate between the simulation and real data.

differences between the distributions obtained for the three simulated scenarios and the real distribution from a. Kernel density estimation with a 100 x 100 grid was used after a log10 transformation of the tMRCA values. RMSD stands for “root-mean-square deviation” with the standard error calculated using jack-knife method (see Methods).

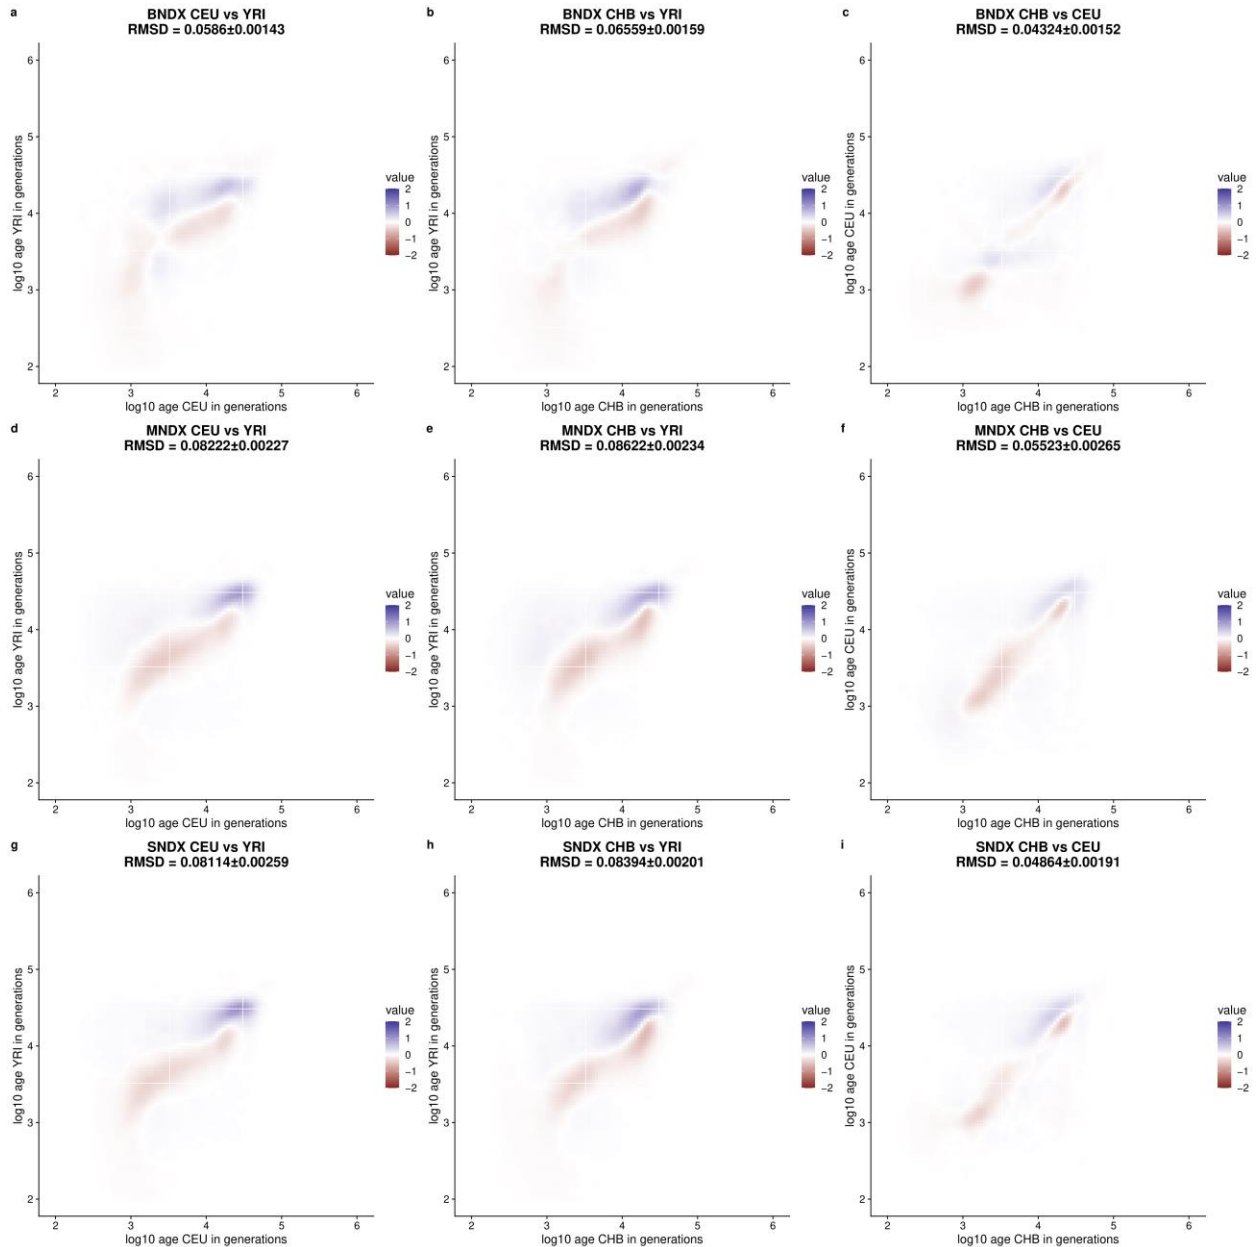

Figure S6: Cross population coalescent rate calculated using relate for Model S

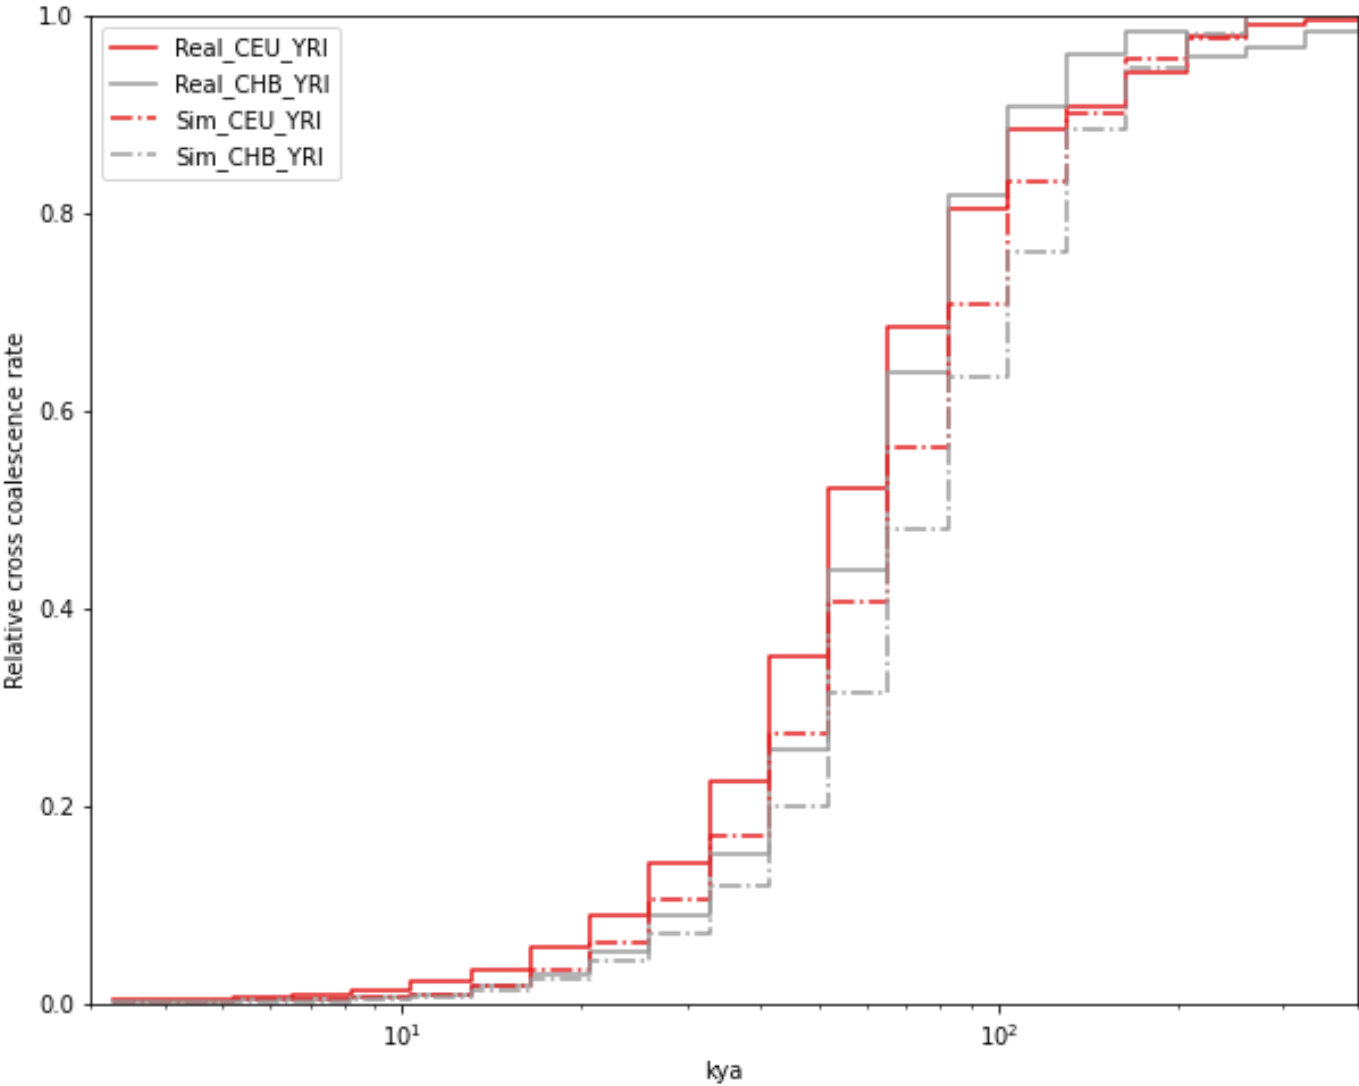

# Supplementary Tables

Table S1: The samples that are used to create real SFS.

| <b>Population Source</b> | <b>1000 Genome</b> | <b>HGDP</b> |
|--------------------------|--------------------|-------------|
| Yoruba                   | NA18853            | HGDP00920   |
| Yoruba                   | NA18856            | HGDP00924   |
| Yoruba                   | NA18858            | HGDP00925   |
| Yoruba                   | NA18861            | HGDP00926   |
| Yoruba                   | NA18864            | HGDP00929   |
| European                 | NA06984            | HGDP00511   |
| European                 | NA06985            | HGDP00512   |
| European                 | NA06986            | HGDP00513   |
| European                 | NA06989            | HGDP00514   |
| European                 | NA06994            | HGDP00515   |
| East Asian               | NA18525            | HGDP00774   |
| East Asian               | NA18526            | HGDP00776   |
| East Asian               | NA18528            | HGDP00777   |
| East Asian               | NA18530            | HGDP00779   |
| East Asian               | NA18531            | HGDP00780   |

Table S2: Cross validation and Model Selection under different strategy for real data.

| <b>Filtering Strategy</b>     | <b>B</b> | <b>M</b> | <b>S</b> |
|-------------------------------|----------|----------|----------|
| B                             | 99.65%   | 0.00%    | 0.35%    |
| M                             | 0.02%    | 99.98%   | 0.00%    |
| S                             | 0.12%    | 0.04%    | 99.84%   |
| Posterior model probabilities | 100.00%  | 0.00%    | 0.00%    |
| <b>Dataset</b>                |          |          |          |
| B                             | 98.89%   | 0.06%    | 1.05%    |
| M                             | 0.17%    | 99.65%   | 0.18%    |
| S                             | 2.62%    | 0.20%    | 97.18%   |
| Posterior model probabilities | 100.00%  | 0.00%    | 0.00%    |

Confusion matrix for misclassification is reported here using SMC for random samples from the models. Posterior model probabilities are final posterior after using the real data.

Table S3: Posterior range for parameters of model B with slower mutation rate.

| Parameters   | Mean   | CI              | Events (kya)          |
|--------------|--------|-----------------|-----------------------|
| N_A          | 17176  | 17165 - 17180   |                       |
| N_AF         | 47609  | 46516 - 49576   |                       |
| N_EU         | 104191 | 101782 - 109469 |                       |
| N_AS         | 127664 | 122811 - 135653 |                       |
| N_EU0        | 2084   | 2062 - 2123     |                       |
| N_AS0        | 852    | 842 - 867       |                       |
| N_BC         | 13914  | 13256 - 15235   |                       |
| N_B          | 2835   | 2819 - 2853     |                       |
| N_AF0        | 33722  | 33364 - 34038   |                       |
| T_DM (ky)    | 21.88  | 21.65 - 22.18   | 21.9 (21.6 - 22.2)    |
| T_EU_AS (ky) | 14.4   | 14.19 - 14.7    | 36.3 (35.9 - 36.6)    |
| T_NM(ky)     | 5.27   | 5.01 - 5.61     | 41.6 (41.1 - 42)      |
| T_XM (ky)    | 25.46  | 25.39 - 25.57   | 61.7 (61.4 - 62.1)    |
| T_Mix (ky)   | 25.61  | 25.46 - 25.68   | 61.9 (61.5 - 62.3)    |
| T_Sep (ky)   | 10.94  | 10.72 - 11.12   | 72.8 (72.4 - 73.3)    |
| T_B (ky)     | 14.92  | 14.77 - 15.14   | 87.8 (87.3 - 88.2)    |
| T_AF (ky)    | 257.47 | 253.21 - 260.14 | 345.2 (341.7 - 348.7) |
| T_N_D (ky)   | 446.28 | 439.64 - 449.89 | 446.3 (439.6 - 449.9) |
| T_H_A (ky)   | 250.25 | 248.23 - 251.1  | 696.5 (691.2 - 701.9) |
| T_H_X (ky)   | 715.46 | 715.39 - 715.49 | 715.5 (715.4 - 715.5) |
| Mix (%)      | 0.9427 | 0.935 - 0.9485  |                       |
| NMix (%)     | 0.0296 | 0.0288 - 0.03   |                       |
| DMix (%)     | 0.0094 | 0.0089 - 0.0097 |                       |
| XMix (%)     | 0.0379 | 0.0375 - 0.0381 |                       |

CI is the confidence interval of 2.5%-97.5% of respective parameters. Ky means kilo years and kya means kilo or thousand years ago from now.

Table S4: Cross validation and Model Selection with total 647 Mb region with the multiple of 25 Kb regions.

|                                      | <b>B</b> | <b>M</b> | <b>S</b> |
|--------------------------------------|----------|----------|----------|
| <b>B</b>                             | 97.41%   | 0.00%    | 2.59%    |
| <b>M</b>                             | 0.00%    | 100.00%  | 0.00%    |
| <b>S</b>                             | 0.87%    | 0.00%    | 99.13%   |
| <b>Posterior model probabilities</b> | 97.41%   | 0.00%    | 2.59%    |

Confusion matrix for misclassification is reported here using SMC for random samples from the models. Posterior model probabilities are final posterior after using the real data.

Table S5: Posterior range of model S.

| <b>Parameters</b>   | <b>Mean</b> | <b>CI</b>       | <b>Events (kya)</b>   |
|---------------------|-------------|-----------------|-----------------------|
| <b>N_A</b>          | 14951       | 14948 - 14952   |                       |
| <b>N_AF</b>         | 16644       | 16591 - 16669   |                       |
| <b>N_EU</b>         | 134965      | 125616 - 140849 |                       |
| <b>N_AS</b>         | 123520      | 118968 - 131342 |                       |
| <b>N_EU0</b>        | 1602        | 1571 - 1620     |                       |
| <b>N_AS0</b>        | 678         | 672 - 691       |                       |
| <b>N_B</b>          | 1233        | 1221 - 1237     |                       |
| <b>T_DM (ky)</b>    | 15.4        | 15.2 - 15.6     | 15.4 (15.2 - 15.6)    |
| <b>T_EU_AS (ky)</b> | 15          | 14.9 - 15.2     | 30.4 (30.1 - 30.7)    |
| <b>T_XM (ky)</b>    | 5.1         | 5.1 - 5.3       | 35.5 (35.2 - 35.8)    |
| <b>T_NM (ky)</b>    | 7.3         | 7.2 - 7.4       | 37.7 (37.4 - 37.9)    |
| <b>T_B (ky)</b>     | 6.4         | 6.3 - 6.6       | 44.1 (43.8 - 44.4)    |
| <b>T_AF (ky)</b>    | 470.8       | 456.9 - 479.1   | 514.9 (503.8 - 526)   |
| <b>T_N_D (ky)</b>   | 455.6       | 455.6 - 455.6   | 455.6 (455.6 - 455.6) |
| <b>T_H_A (ky)</b>   | 255.6       | 255.6 - 255.6   | 711.2 (711.2 - 711.3) |
| <b>T_H_X (ky)</b>   | 692.4       | 687.6 - 695.3   | 692.4 (687.6 - 695.3) |
| <b>NMix (%)</b>     | 2.94        | 2.84 – 2.99     |                       |
| <b>DMix (%)</b>     | 0.85        | 0.8 – 0.87      |                       |
| <b>XMix (%)</b>     | 6.98        | 6.88 – 7.04     |                       |

CI is the confidence interval of 2.5%-97.5% of respective parameters. Ky is kilo years and kya is kilo years ago from now.

Table S6: Posterior range of model M.

| Parameters   | Mean   | CI             | Events (kya)          |
|--------------|--------|----------------|-----------------------|
| N_A          | 14720  | 14675 - 14775  |                       |
| N_AF         | 16967  | 16863 - 17068  |                       |
| N_EU         | 50317  | 39111 - 59103  |                       |
| N_AS         | 115455 | 90962 - 132625 |                       |
| N_EU0        | 1552   | 1423 - 1689    |                       |
| N_AS0        | 543    | 520 - 567      |                       |
| N_MX         | 512    | 500 - 526      |                       |
| N_B          | 4697   | 4136 - 4988    |                       |
| N_B0         | 27170  | 11057 - 39637  |                       |
| T_DM (ky)    | 11.9   | 11.1 - 12.7    | 11.9 (11.1 - 12.7)    |
| T_EU_AS (ky) | 12.2   | 11.2 - 13.1    | 24.1 (22.9 - 25.3)    |
| T_NM (ky)    | 5.2    | 5 - 5.5        | 29.3 (28.1 - 30.6)    |
| T_XM (ky)    | 12.8   | 12.4 - 13.1    | 36.8 (35.6 - 38.1)    |
| T_Mix (ky)   | 5.3    | 5.1 - 5.6      | 29.4 (28.2 - 30.7)    |
| T_Sep (ky)   | 7.2    | 7 - 7.4        | 44.1 (42.8 - 45.4)    |
| T_B (ky)     | 13.6   | 10.9 - 19.9    | 57.7 (53 - 62.4)      |
| T_AF (ky)    | 369.4  | 344.4 - 393.8  | 427.1 (401.9 - 452.3) |
| T_N_D (ky)   | 422.6  | 384.3 - 450.4  | 422.6 (384.3 - 450.4) |
| T_H_A (ky)   | 218.4  | 187.9 - 247.7  | 641 (596.5 - 685.6)   |
| T_H_X (ky)   | 686.8  | 678.1 - 698.2  | 686.8 (678.1 - 698.2) |
| Mix (%)      | 92.15  | 91.87 – 92.62  |                       |
| NMix (%)     | 2.59   | 2.46 – 2.78    |                       |
| DMix (%)     | 0.63   | 0.55 – 0.68    |                       |
| XMix (%)     | 7.1    | 6.97 – 7.24    |                       |

CI is the confidence interval of 2.5%-97.5% of respective parameters. Ky is kilo years and kya is kilo years ago from now.

Table S7: Cross validation and Model Selection with top two models (BNDX and BNDXF).

|                                      | BNDX   | BNDXF  |
|--------------------------------------|--------|--------|
| <b>BNDX</b>                          | 88.92% | 11.08% |
| <b>BNDXF</b>                         | 13.44% | 86.56% |
| <b>Posterior model probabilities</b> | 97.83% | 2.17%  |

Confusion matrix for misclassification is reported here using SMC for random samples from the models. Posterior model probabilities are final posterior after using the real data.

Table S8: Prior and Posterior range of Out Of Africa model with migrations.

| <b>Parameters</b>                                      | <b>Prior</b>   | <b>Posterior</b>         |
|--------------------------------------------------------|----------------|--------------------------|
| <b>N<sub>A</sub></b>                                   | 5000 - 25000   | 16479 (16425 - 16515)    |
| <b>N<sub>AF</sub></b>                                  | 10000 - 150000 | 22792 (22676 - 22962)    |
| <b>N<sub>EU</sub></b>                                  | 10000 - 150000 | 112007 (106124 - 116503) |
| <b>N<sub>AS</sub></b>                                  | 10000 - 150000 | 125069 (118531 - 130843) |
| <b>N<sub>EU0</sub></b>                                 | 500 - 5000     | 1110 (1092 - 1127)       |
| <b>N<sub>AS0</sub></b>                                 | 500 - 5000     | 588 (580 - 597)          |
| <b>N<sub>B</sub></b>                                   | 500 - 5000     | 3978 (3974 - 3987)       |
| <b>T<sub>EU_AS</sub> (ky)</b>                          | 15 - 80        | 40.6 (40.4 - 40.8)       |
| <b>T<sub>B</sub> (ky)</b>                              | 5 - 320        | 313.9 (283 - 329.2)      |
| <b>T<sub>AF</sub> (ky)</b>                             | 5 - 700        | 186.6 (182.6 - 194.5)    |
| <b>m<sub>AF_B</sub> (<math>\times 10^{-5}</math>)</b>  | 0 - 50         | 19.49 (19.32 - 19.69)    |
| <b>m<sub>AF_EU</sub> (<math>\times 10^{-5}</math>)</b> | 0 - 50         | 0.66 (0.59 - 0.72)       |
| <b>m<sub>AF_AS</sub> (<math>\times 10^{-5}</math>)</b> | 0 - 50         | 0.76 (0.7 - 0.82)        |
| <b>m<sub>EU_AS</sub> (<math>\times 10^{-5}</math>)</b> | 0 - 50         | 9.31 (9.08 - 9.43)       |

Posterior column represents Mean and CI (Confidence Interval of 2.5%-97.5%) of respective parameters. Migration rates are denoted by m<sub>pop1\_pop2</sub>, where pop1 is the population that received the migration, and pop2 is the population from where the migration originated. Here the migration rates are bi-directional and equal.



Table S9: Posterior range of model B with migration rates with known parameters coming from a simulation from Table 2.

| Parameters                   | Mean   | 2.5P   | 97.5P  |
|------------------------------|--------|--------|--------|
| N_A                          | 13990  | 13793  | 14099  |
| N_AF                         | 15170  | 11158  | 21346  |
| N_EU                         | 71138  | 17116  | 136660 |
| N_AS                         | 78385  | 32652  | 132758 |
| N_EU0                        | 1932   | 1309   | 3495   |
| N_AS0                        | 677    | 561    | 857    |
| N_BC                         | 23119  | 5355   | 38949  |
| N_B                          | 2134   | 1797   | 2457   |
| N_AF0                        | 31272  | 23403  | 39594  |
| T_DM (ky)                    | 21.4   | 17.5   | 24.5   |
| T_EU_AS (ky)                 | 9.7    | 7.4    | 12.4   |
| T_NM (ky)                    | 5.8    | 5.1    | 7.2    |
| T_XM (ky)                    | 23.3   | 4.2    | 41.1   |
| T_Mix (ky)                   | 14.8   | 6.2    | 24.2   |
| T_Sep (ky)                   | 12.5   | 5.3    | 20.7   |
| T_B (ky)                     | 15.4   | 6.0    | 22.9   |
| T_AF (ky)                    | 315.2  | 272.9  | 371.3  |
| T_N_D (ky)                   | 429.6  | 396.0  | 448.5  |
| T_H_A (ky)                   | 228.5  | 200.2  | 248.7  |
| T_H_X (ky)                   | 589.7  | 481.4  | 695.5  |
| Mix (%)                      | 77.18% | 64.97% | 92.65% |
| NMix (%)                     | 2.56%  | 2.12%  | 2.96%  |
| DMix (%)                     | 1.17%  | 0.92%  | 1.32%  |
| XMix (%)                     | 5.77%  | 1.02%  | 9.87%  |
| m_AF_B ( $\times 10^{-5}$ )  | 6.33   | 0.07   | 15.24  |
| m_B_AF ( $\times 10^{-5}$ )  | 6.51   | 4.47   | 10.05  |
| m_AF_EU ( $\times 10^{-5}$ ) | 0.57   | 0.03   | 1.38   |
| m_EU_AF ( $\times 10^{-5}$ ) | 0.47   | 0.05   | 0.89   |
| m_AF_AS ( $\times 10^{-5}$ ) | 2.27   | 1.31   | 3.00   |
| m_AS_AF ( $\times 10^{-5}$ ) | 0.25   | -0.02  | 0.65   |
| m_EU_AS ( $\times 10^{-5}$ ) | 1.18   | 0.01   | 3.81   |
| m_AS_EU ( $\times 10^{-5}$ ) | 1.86   | 0.27   | 4.44   |

2.5P is 2.5 percentile and 97.5P is 97.5 percentile. Ky is kilo years. Migration rates are denoted by  $m_{pop1\_pop2}$ , where pop1 is the population that received the migration, and pop2 is the population from where the migration originated

Table S10: Posterior range of model S with migration rates with known parameters coming from a simulation from Table 2.

| <b>Parameters</b>                            | <b>Mean</b> | <b>2.5P</b> | <b>97.5P</b> |
|----------------------------------------------|-------------|-------------|--------------|
| <b>N_A</b>                                   | 14,188      | 14,126      | 14,213       |
| <b>N_AF</b>                                  | 17,013      | 16,889      | 17,109       |
| <b>N_EU</b>                                  | 84,543      | 38,042      | 132,514      |
| <b>N_AS</b>                                  | 85,412      | 51,985      | 132,469      |
| <b>N_EU0</b>                                 | 1,779       | 1,442       | 2,236        |
| <b>N_AS0</b>                                 | 661         | 609         | 735          |
| <b>N_B</b>                                   | 1,620       | 1,446       | 1,705        |
| <b>T_DM (ky)</b>                             | 22.3        | 20.5        | 23.9         |
| <b>T_EU_AS (ky)</b>                          | 7.8         | 6.6         | 9.5          |
| <b>T_NM (ky)</b>                             | 5.1         | 5.0         | 5.3          |
| <b>T_XM (ky)</b>                             | 12.7        | 5.8         | 19.7         |
| <b>T_B (ky)</b>                              | 13.4        | 5.9         | 20.2         |
| <b>T_AF (ky)</b>                             | 577.0       | 548.6       | 595.3        |
| <b>T_N_D (ky)</b>                            | 439.3       | 419.0       | 449.9        |
| <b>T_H_A (ky)</b>                            | 236.3       | 213.1       | 249.3        |
| <b>T_H_X (ky)</b>                            | 587.5       | 471.8       | 692.9        |
| <b>NMix (%)</b>                              | 3%          | 2%          | 3%           |
| <b>DMix (%)</b>                              | 1%          | 1%          | 1%           |
| <b>XMix (%)</b>                              | 1%          | 0%          | 1%           |
| <b>m_AF_B (<math>\times 10^{-5}</math>)</b>  | 14.51       | 12.19       | 18.52        |
| <b>m_B_AF (<math>\times 10^{-5}</math>)</b>  | 13.31       | 12.64       | 14.38        |
| <b>m_AF_EU (<math>\times 10^{-5}</math>)</b> | 1.38        | 0.80        | 2.16         |
| <b>m_EU_AF (<math>\times 10^{-5}</math>)</b> | 0.07        | 0.00        | 0.23         |
| <b>m_AF_AS (<math>\times 10^{-5}</math>)</b> | 2.38        | 1.78        | 2.78         |
| <b>m_AS_AF (<math>\times 10^{-5}</math>)</b> | 0.12        | 0.00        | 0.30         |
| <b>m_EU_AS (<math>\times 10^{-5}</math>)</b> | 0.86        | 0.04        | 2.44         |
| <b>m_AS_EU (<math>\times 10^{-5}</math>)</b> | 1.38        | 0.00        | 2.91         |

2.5P is 2.5 percentile and 97.5P is 97.5 percentile. Ky is kilo years. Migration rates are denoted by  $m_{pop1\_pop2}$ , where pop1 is the population that received the migration, and pop2 is the population from where the migration originated

Table S11: Relations of events with the time intervals that were used in the simulations.

| <b>Events</b>                         | <b>Model S</b>           | <b>Model B</b>           | <b>Model M</b>           |
|---------------------------------------|--------------------------|--------------------------|--------------------------|
| <b>Farming Admixture</b>              | T_FM                     | T_FM                     | T_FM                     |
| <b>Farming Separation (FS)</b>        | T_FM + T_FS              | T_FM + T_FS              | T_FM + T_FS              |
| <b>Denisova Introgression</b>         | T_DM                     | T_DM                     | T_DM                     |
| <b>Split Europe Asia (E_A)</b>        | max (T_DM, FS) + T_EU_AS | max (T_DM, FS) + T_EU_AS | max (T_DM, FS) + T_EU_AS |
| <b>Neanderthal Introgression (NI)</b> | E_A + T_NM               | E_A + T_NM               | E_A + T_NM               |
| <b>African Introgression (AI)</b>     | E_A + T_XM               | E_A + T_XM               | E_A + T_XM               |
| <b>Admixture (Mix)</b>                | NA                       | E_A + T_Mix              | E_A + T_Mix              |
| <b>Separation (Sep)</b>               | NA                       | Mix + T_Sep              | Mix + T_Sep              |
| <b>Split Africa OOA (OOA)</b>         | max (NI, AI) + T_B       | max (NI, AI, Sep) + T_B  | max (NI, AI, Sep) + T_B  |
| <b>Ancestral Size change</b>          | OOA + T_AF               | OOA + T_AF               | OOA + T_AF               |
| <b>Split Neanderthal Denisova</b>     | T_N_D                    | T_N_D                    | T_N_D                    |
| <b>Split Human Neanderthal</b>        | T_N_D + T_H_A            | T_N_D + T_H_A            | T_N_D + T_H_A            |
| <b>Split human African archaic</b>    | T_H_X                    | T_H_X                    | T_H_X                    |

Table S12: Posterior range of model B with known parameters coming from a simulation from Table 2.

| <b>Parameters</b> | <b>Mean</b> | <b>2.5P</b> | <b>97.5P</b> |
|-------------------|-------------|-------------|--------------|
| <b>N_A</b>        | 14,375      | 14,257      | 14,463       |
| <b>N_AF</b>       | 92,921      | 41,110      | 144,818      |
| <b>N_EU</b>       | 69,243      | 10,029      | 146,385      |
| <b>N_AS</b>       | 83,525      | 42,971      | 141,114      |
| <b>N_EU0</b>      | 2,129       | 1,434       | 3,748        |
| <b>N_AS0</b>      | 756         | 643         | 897          |
| <b>N_BC</b>       | 9,341       | 3,436       | 17,813       |
| <b>N_B</b>        | 2,377       | 2,142       | 2,619        |
| <b>N_AF0</b>      | 32,057      | 23,728      | 39,527       |
| <b>T_DM</b>       | 17.2        | 12.6        | 21.6         |
| <b>T_EU_AS</b>    | 14.3        | 9.7         | 19.7         |
| <b>T_NM</b>       | 5.4         | 5.0         | 6.3          |
| <b>T_XM</b>       | 25.1        | 7.9         | 43.2         |
| <b>T_Mix</b>      | 11.5        | 4.8         | 20.7         |
| <b>T_Sep</b>      | 17.4        | 9.9         | 26.4         |
| <b>T_B</b>        | 13.7        | 6.2         | 21.4         |
| <b>T_AF</b>       | 234.3       | 188.1       | 303.6        |
| <b>T_N_D</b>      | 430.1       | 396.8       | 447.5        |
| <b>T_H_A</b>      | 229.4       | 200.7       | 249.0        |
| <b>T_H_X</b>      | 589.4       | 483.3       | 689.6        |
| <b>Mix</b>        | 92.19%      | 86.29%      | 94.93%       |
| <b>Nmix</b>       | 2.79%       | 2.49%       | 2.98%        |
| <b>Dmix</b>       | 0.79%       | 0.64%       | 0.97%        |
| <b>Xmix</b>       | 3.94%       | 0.04%       | 9.08%        |

2.5P is 2.5 percentile and 97.5P is 97.5 percentile of confidence interval for respective parameters. Ky means kilo or thousand years.

Table S13: Cross validation and Model Selection with no introgression and Neolithic migration models.

|                                      | <b>B</b> | <b>M</b> | <b>S</b> |
|--------------------------------------|----------|----------|----------|
| <b>B</b>                             | 100.00%  | 0.00%    | 0.00%    |
| <b>M</b>                             | 0.00%    | 100.00%  | 0.00%    |
| <b>S</b>                             | 0.00%    | 0.00%    | 100.00%  |
| <b>Posterior model probabilities</b> | 0.00%    | 100.00%  | 0.00%    |

Confusion matrix for misclassification is reported here using SMC for random samples from the models. Posterior model probabilities are final posterior after using the real data.

Table S14: Cross validation and Model Selection with all the models together by DLS.

|                                                        | <b>BN<br/>D</b> | <b>BN<br/>DF</b> | <b>BN<br/>DX</b> | <b>BN<br/>DXF</b> | <b>BNI</b>  | <b>MN<br/>D</b> | <b>MN<br/>DF</b> | <b>MN<br/>DX</b> | <b>MN<br/>DXF</b> | <b>MNI</b>  | <b>SND</b>  | <b>SN<br/>DF</b> | <b>SN<br/>DX</b> | <b>SND<br/>XF</b> | <b>SNI</b> |
|--------------------------------------------------------|-----------------|------------------|------------------|-------------------|-------------|-----------------|------------------|------------------|-------------------|-------------|-------------|------------------|------------------|-------------------|------------|
| <b>BND</b>                                             | 58.2<br>4%      | 24.0<br>8%       | 11.0<br>2%       | 6.46<br>%         | 0.00<br>%   | 0.04<br>%       | 0.00<br>%        | 0.00<br>%        | 0.00<br>%         | 0.00<br>%   | 0.16<br>%   | 0.00<br>%        | 0.00<br>%        | 0.00<br>%         | 0.00<br>%  |
| <b>BNDF</b>                                            | 22.4<br>2%      | 57.9<br>2%       | 3.81<br>%        | 13.9<br>4%        | 0.00<br>%   | 0.00<br>%       | 1.02<br>%        | 0.00<br>%        | 0.00<br>%         | 0.00<br>%   | 0.00<br>%   | 0.26<br>%        | 0.00<br>%        | 0.62<br>%         | 0.00<br>%  |
| <b>BNDX</b>                                            | 10.4<br>0%      | 4.11<br>%        | 65.1<br>3%       | 19.4<br>0%        | 0.00<br>%   | 0.02<br>%       | 0.00<br>%        | 0.00<br>%        | 0.00<br>%         | 0.00<br>%   | 0.94<br>%   | 0.00<br>%        | 0.00<br>%        | 0.00<br>%         | 0.00<br>%  |
| <b>BNDX<br/>F</b>                                      | 8.33<br>%       | 18.6<br>5%       | 15.6<br>6%       | 56.1<br>2%        | 0.00<br>%   | 0.04<br>%       | 0.00<br>%        | 0.00<br>%        | 0.90<br>%         | 0.00<br>%   | 0.10<br>%   | 0.00<br>%        | 0.00<br>%        | 0.20<br>%         | 0.00<br>%  |
| <b>BNI</b>                                             | 0.00<br>%       | 0.00<br>%        | 0.00<br>%        | 0.00<br>%         | 100.<br>00% | 0.00<br>%       | 0.00<br>%        | 0.00<br>%        | 0.00<br>%         | 0.00<br>%   | 0.00<br>%   | 0.00<br>%        | 0.00<br>%        | 0.00<br>%         | 0.00<br>%  |
| <b>MND</b>                                             | 0.02<br>%       | 0.00<br>%        | 0.02<br>%        | 0.02<br>%         | 0.00<br>%   | 98.8<br>0%      | 0.20<br>%        | 0.00<br>%        | 0.00<br>%         | 0.00<br>%   | 0.94<br>%   | 0.00<br>%        | 0.00<br>%        | 0.00<br>%         | 0.00<br>%  |
| <b>MNDF</b>                                            | 0.04<br>%       | 0.67<br>%        | 0.00<br>%        | 0.12<br>%         | 0.00<br>%   | 0.00<br>%       | 92.4<br>4%       | 0.00<br>%        | 0.00<br>%         | 0.00<br>%   | 0.00<br>%   | 6.69<br>%        | 0.00<br>%        | 0.04<br>%         | 0.00<br>%  |
| <b>MNDX</b>                                            | 0.00<br>%       | 0.00<br>%        | 0.92<br>%        | 0.14<br>%         | 0.00<br>%   | 0.00<br>%       | 0.00<br>%        | 98.4<br>0%       | 0.02<br>%         | 0.00<br>%   | 0.00<br>%   | 0.00<br>%        | 0.52<br>%        | 0.00<br>%         | 0.00<br>%  |
| <b>MNDX<br/>F</b>                                      | 0.00<br>%       | 0.00<br>%        | 0.08<br>%        | 0.26<br>%         | 0.00<br>%   | 0.00<br>%       | 0.00<br>%        | 0.00<br>%        | 97.7<br>3%        | 0.00<br>%   | 0.00<br>%   | 0.00<br>%        | 0.00<br>%        | 1.93<br>%         | 0.00<br>%  |
| <b>MNI</b>                                             | 0.00<br>%       | 0.00<br>%        | 0.00<br>%        | 0.00<br>%         | 0.00<br>%   | 0.00<br>%       | 0.00<br>%        | 0.00<br>%        | 0.00<br>%         | 100.<br>00% | 0.00<br>%   | 0.00<br>%        | 0.00<br>%        | 0.00<br>%         | 0.00<br>%  |
| <b>SND</b>                                             | 0.00<br>%       | 0.00<br>%        | 0.00<br>%        | 0.00<br>%         | 0.00<br>%   | 0.00<br>%       | 0.00<br>%        | 0.00<br>%        | 0.00<br>%         | 0.00<br>%   | 100.<br>00% | 0.00<br>%        | 0.00<br>%        | 0.00<br>%         | 0.00<br>%  |
| <b>SNDF</b>                                            | 0.00<br>%       | 0.16<br>%        | 0.00<br>%        | 0.00<br>%         | 0.00<br>%   | 0.00<br>%       | 4.42<br>%        | 0.00<br>%        | 0.00<br>%         | 0.00<br>%   | 0.00<br>%   | 95.1<br>1%       | 0.00<br>%        | 0.32<br>%         | 0.00<br>%  |
| <b>SNDX</b>                                            | 0.00<br>%       | 0.00<br>%        | 0.20<br>%        | 0.04<br>%         | 0.00<br>%   | 0.00<br>%       | 0.00<br>%        | 0.16<br>%        | 0.00<br>%         | 0.00<br>%   | 0.00<br>%   | 0.00<br>%        | 99.5<br>9%       | 0.00<br>%         | 0.00<br>%  |
| <b>SNDX<br/>F</b>                                      | 0.00<br>%       | 0.39<br>%        | 0.00<br>%        | 1.64<br>%         | 0.00<br>%   | 0.00<br>%       | 0.04<br>%        | 0.00<br>%        | 0.41<br>%         | 0.00<br>%   | 0.00<br>%   | 1.06<br>%        | 0.00<br>%        | 96.4<br>6%        | 0.00<br>%  |
| <b>SNI</b>                                             | 0.00<br>%       | 0.00<br>%        | 0.00<br>%        | 0.00<br>%         | 0.00<br>%   | 0.04<br>%       | 0.00<br>%        | 0.00<br>%        | 0.00<br>%         | 0.00<br>%   | 0.00<br>%   | 0.00<br>%        | 0.00<br>%        | 0.00<br>%         | 99.9<br>6% |
| <b>Posteri<br/>or<br/>model<br/>probab<br/>ilities</b> | 0.00<br>%       | 0.00<br>%        | 85.7<br>9%       | 14.2<br>1%        | 0.00<br>%   | 0.00<br>%       | 0.00<br>%        | 0.00<br>%        | 0.00<br>%         | 0.00<br>%   | 0.00<br>%   | 0.00<br>%        | 0.00<br>%        | 0.00<br>%         | 0.00<br>%  |

Confusion matrix for misclassification is reported here using DLS for random samples from the models. Posterior model probabilities are final posterior after using the real data. ([B, M, S]x [No Introgression; Neanderthal and Denisova Introgression (ND); Neanderthal, Denisova and Africa archaic introgression (NDX); Neanderthal, Denisova introgression and Farming Migration (NDF); Neanderthal, Denisova, African archaic introgression and Farming Migration (NDXF)])

Table S15: Cross validation and Model Selection with all the models together by RF method.

|                                        | <b>BN<br/>D</b> | <b>BN<br/>DF</b> | <b>BN<br/>DX</b> | <b>BND<br/>XF</b> | <b>BNI</b> | <b>MN<br/>D</b> | <b>MN<br/>DF</b> | <b>MN<br/>DX</b> | <b>MN<br/>DXF</b> | <b>MN<br/>I</b> | <b>SN<br/>D</b> | <b>SN<br/>DF</b> | <b>SN<br/>DX</b> | <b>SND<br/>XF</b> | <b>SNI</b> |
|----------------------------------------|-----------------|------------------|------------------|-------------------|------------|-----------------|------------------|------------------|-------------------|-----------------|-----------------|------------------|------------------|-------------------|------------|
| <b>BND</b>                             | 37.8<br>2%      | 11.8<br>6%       | 31.8<br>9%       | 9.22<br>%         | 1.80<br>%  | 0.42<br>%       | 1.06<br>%        | 0.32<br>%        | 0.85<br>%         | 0.11<br>%       | 0.95<br>%       | 1.38<br>%        | 0.85<br>%        | 1.17<br>%         | 0.32<br>%  |
| <b>BND<br/>F</b>                       | 14.2<br>7%      | 38.1<br>3%       | 10.4<br>2%       | 30.4<br>2%        | 1.35<br>%  | 0.10<br>%       | 0.73<br>%        | 0.10<br>%        | 0.52<br>%         | 0.00<br>%       | 0.10<br>%       | 1.98<br>%        | 0.10<br>%        | 1.67<br>%         | 0.10<br>%  |
| <b>BND<br/>X</b>                       | 33.0<br>4%      | 10.7<br>1%       | 36.8<br>6%       | 11.1<br>0%        | 0.51<br>%  | 0.13<br>%       | 0.77<br>%        | 0.38<br>%        | 0.77<br>%         | 0.00<br>%       | 1.15<br>%       | 1.66<br>%        | 1.66<br>%        | 1.15<br>%         | 0.13<br>%  |
| <b>BND<br/>XF</b>                      | 10.1<br>8%      | 30.9<br>9%       | 13.4<br>1%       | 39.5<br>9%        | 0.46<br>%  | 0.00<br>%       | 0.56<br>%        | 0.00<br>%        | 0.93<br>%         | 0.00<br>%       | 0.00<br>%       | 2.04<br>%        | 0.00<br>%        | 1.76<br>%         | 0.09<br>%  |
| <b>BNI</b>                             | 2.89<br>%       | 2.26<br>%        | 3.25<br>%        | 3.25<br>%         | 80.6<br>5% | 0.00<br>%       | 0.45<br>%        | 0.09<br>%        | 0.09<br>%         | 1.90<br>%       | 0.36<br>%       | 0.45<br>%        | 0.18<br>%        | 0.27<br>%         | 3.89<br>%  |
| <b>MND</b>                             | 0.72<br>%       | 0.00<br>%        | 0.51<br>%        | 0.31<br>%         | 0.00<br>%  | 32.8<br>5%      | 10.9<br>2%       | 28.2<br>2%       | 7.93<br>%         | 7.00<br>%       | 5.66<br>%       | 0.82<br>%        | 3.60<br>%        | 0.72<br>%         | 0.72<br>%  |
| <b>MND<br/>F</b>                       | 1.94<br>%       | 0.61<br>%        | 1.33<br>%        | 0.97<br>%         | 0.48<br>%  | 8.48<br>%       | 32.3<br>6%       | 7.76<br>%        | 27.88<br>%        | 2.06<br>%       | 1.94<br>%       | 5.94<br>%        | 1.82<br>%        | 4.61<br>%         | 1.82<br>%  |
| <b>MND<br/>X</b>                       | 0.00<br>%       | 0.00<br>%        | 0.11<br>%        | 0.00<br>%         | 0.00<br>%  | 28.9<br>9%      | 7.65<br>%        | 30.8<br>2%       | 10.24<br>%        | 7.76<br>%       | 5.71<br>%       | 0.65<br>%        | 6.14<br>%        | 0.97<br>%         | 0.97<br>%  |
| <b>MND<br/>XF</b>                      | 0.64<br>%       | 1.17<br>%        | 1.38<br>%        | 0.96<br>%         | 0.32<br>%  | 3.83<br>%       | 31.4<br>2%       | 5.64<br>%        | 34.19<br>%        | 2.02<br>%       | 1.81<br>%       | 7.56<br>%        | 1.70<br>%        | 5.96<br>%         | 1.38<br>%  |
| <b>MNI</b>                             | 0.15<br>%       | 0.15<br>%        | 0.59<br>%        | 0.15<br>%         | 1.03<br>%  | 11.3<br>4%      | 5.67<br>%        | 11.4<br>9%       | 6.11<br>%         | 47.9<br>4%      | 1.91<br>%       | 0.44<br>%        | 1.03<br>%        | 0.52<br>%         | 11.4<br>9% |
| <b>SND</b>                             | 0.63<br>%       | 0.27<br>%        | 1.17<br>%        | 0.00<br>%         | 0.00<br>%  | 6.12<br>%       | 0.99<br>%        | 6.30<br>%        | 1.26<br>%         | 0.36<br>%       | 34.9<br>2%      | 6.39<br>%        | 34.2<br>9%       | 4.86<br>%         | 2.43<br>%  |
| <b>SND<br/>F</b>                       | 2.79<br>%       | 3.52<br>%        | 3.40<br>%        | 2.55<br>%         | 0.12<br>%  | 0.61<br>%       | 5.95<br>%        | 0.36<br>%        | 6.31<br>%         | 0.00<br>%       | 1.09<br>%       | 35.9<br>2%       | 1.58<br>%        | 35.5<br>6%        | 0.24<br>%  |
| <b>SND<br/>X</b>                       | 0.38<br>%       | 0.00<br>%        | 0.47<br>%        | 0.09<br>%         | 0.00<br>%  | 5.00<br>%       | 1.13<br>%        | 5.66<br>%        | 1.42<br>%         | 0.66<br>%       | 32.9<br>2%      | 6.04<br>%        | 36.9<br>8%       | 7.45<br>%         | 1.79<br>%  |
| <b>SND<br/>XF</b>                      | 3.37<br>%       | 2.69<br>%        | 3.94<br>%        | 2.31<br>%         | 0.67<br>%  | 0.38<br>%       | 5.58<br>%        | 0.48<br>%        | 6.73<br>%         | 0.38<br>%       | 1.54<br>%       | 33.1<br>7%       | 1.54<br>%        | 37.1<br>2%        | 0.10<br>%  |
| <b>SNI</b>                             | 0.47<br>%       | 0.00<br>%        | 0.37<br>%        | 0.19<br>%         | 3.74<br>%  | 1.50<br>%       | 1.87<br>%        | 1.96<br>%        | 1.22<br>%         | 12.7<br>2%      | 4.49<br>%       | 1.12<br>%        | 3.46<br>%        | 1.22<br>%         | 65.6<br>7% |
| <b>Poste<br/>rior<br/>of<br/>votes</b> | 19.0<br>0%      | 27.1<br>5%       | 15.2<br>0%       | 15.8<br>0%        | 2.35<br>%  | 1.45<br>%       | 7.35<br>%        | 0.85<br>%        | 3.05<br>%         | 0.65<br>%       | 1.00<br>%       | 1.75<br>%        | 0.70<br>%        | 3.45<br>%         | 0.25<br>%  |

Confusion matrix for misclassification is reported here using DL for random samples from the models. Posterior model probabilities are final posterior after using the real data. ([B, M, S]x [No Introgression; Neanderthal and Denisova Introgression (ND); Neanderthal, Denisova and Africa archaic introgression (NDX); Neanderthal, Denisova introgression and Farming Migration (NDF); Neanderthal, Denisova, African archaic introgression and Farming Migration (NDXF)])



Table S16: Cross validation and Model Selection with all the models together by DL method.

|                                                        | <b>BN<br/>D</b> | <b>BN<br/>DF</b> | <b>BN<br/>DX</b> | <b>BND<br/>XF</b> | <b>BNI</b> | <b>MN<br/>D</b> | <b>MN<br/>DF</b> | <b>MN<br/>DX</b> | <b>MN<br/>DXF</b> | <b>MN<br/>I</b> | <b>SN<br/>D</b> | <b>SN<br/>DF</b> | <b>SN<br/>DX</b> | <b>SND<br/>XF</b> | <b>SNI</b> |
|--------------------------------------------------------|-----------------|------------------|------------------|-------------------|------------|-----------------|------------------|------------------|-------------------|-----------------|-----------------|------------------|------------------|-------------------|------------|
| <b>BND</b>                                             | 37.7<br>8%      | 14.2<br>0%       | 31.1<br>2%       | 10.8<br>4%        | 0.10<br>%  | 0.10<br>%       | 0.42<br>%        | 0.12<br>%        | 0.38<br>%         | 0.26<br>%       | 1.47<br>%       | 0.79<br>%        | 1.09<br>%        | 0.73<br>%         | 0.60<br>%  |
| <b>BNDF</b>                                            | 13.6<br>4%      | 38.7<br>8%       | 11.5<br>1%       | 28.1<br>7%        | 0.00<br>%  | 0.02<br>%       | 0.77<br>%        | 0.02<br>%        | 0.54<br>%         | 0.00<br>%       | 0.28<br>%       | 3.54<br>%        | 0.18<br>%        | 2.56<br>%         | 0.00<br>%  |
| <b>BNDX</b>                                            | 31.4<br>9%      | 13.1<br>2%       | 35.1<br>1%       | 14.5<br>4%        | 0.26<br>%  | 0.04<br>%       | 0.70<br>%        | 0.10<br>%        | 0.78<br>%         | 0.00<br>%       | 1.06<br>%       | 1.10<br>%        | 0.65<br>%        | 1.04<br>%         | 0.00<br>%  |
| <b>BNDX<br/>F</b>                                      | 11.0<br>5%      | 30.5<br>6%       | 14.2<br>3%       | 39.0<br>0%        | 0.02<br>%  | 0.00<br>%       | 0.53<br>%        | 0.00<br>%        | 0.76<br>%         | 0.00<br>%       | 0.06<br>%       | 2.09<br>%        | 0.00<br>%        | 1.71<br>%         | 0.00<br>%  |
| <b>BNI</b>                                             | 1.52<br>%       | 1.45<br>%        | 1.30<br>%        | 1.03<br>%         | 91.0<br>2% | 0.02<br>%       | 0.21<br>%        | 0.00<br>%        | 0.16<br>%         | 0.24<br>%       | 0.00<br>%       | 0.12<br>%        | 0.00<br>%        | 0.24<br>%         | 2.70<br>%  |
| <b>MND</b>                                             | 0.20<br>%       | 0.02<br>%        | 0.12<br>%        | 0.02<br>%         | 0.00<br>%  | 34.2<br>2%      | 7.54<br>%        | 30.9<br>2%       | 5.94<br>%         | 12.2<br>1%      | 4.65<br>%       | 0.23<br>%        | 2.51<br>%        | 0.27<br>%         | 1.13<br>%  |
| <b>MNDF</b>                                            | 0.39<br>%       | 1.08<br>%        | 0.24<br>%        | 0.60<br>%         | 0.56<br>%  | 4.74<br>%       | 39.7<br>7%       | 3.81<br>%        | 33.00<br>%        | 1.14<br>%       | 1.23<br>%       | 7.47<br>%        | 0.43<br>%        | 5.11<br>%         | 0.44<br>%  |
| <b>MNDX</b>                                            | 0.12<br>%       | 0.00<br>%        | 0.04<br>%        | 0.00<br>%         | 0.00<br>%  | 32.5<br>5%      | 4.98<br>%        | 34.2<br>9%       | 5.57<br>%         | 8.29<br>%       | 5.95<br>%       | 0.29<br>%        | 5.62<br>%        | 0.29<br>%         | 1.99<br>%  |
| <b>MNDX<br/>F</b>                                      | 0.20<br>%       | 0.39<br>%        | 0.45<br>%        | 0.08<br>%         | 0.00<br>%  | 4.65<br>%       | 31.9<br>0%       | 4.17<br>%        | 34.11<br>%        | 1.85<br>%       | 2.71<br>%       | 8.93<br>%        | 2.77<br>%        | 7.56<br>%         | 0.24<br>%  |
| <b>MNI</b>                                             | 0.04<br>%       | 0.06<br>%        | 0.06<br>%        | 0.00<br>%         | 0.58<br>%  | 13.7<br>2%      | 1.50<br>%        | 11.6<br>9%       | 1.19<br>%         | 58.4<br>0%      | 1.67<br>%       | 0.12<br>%        | 1.36<br>%        | 0.02<br>%         | 9.61<br>%  |
| <b>SND</b>                                             | 1.09<br>%       | 0.12<br>%        | 1.01<br>%        | 0.14<br>%         | 0.02<br>%  | 4.61<br>%       | 2.31<br>%        | 4.80<br>%        | 2.18<br>%         | 1.42<br>%       | 39.0<br>6%      | 2.41<br>%        | 35.8<br>0%       | 2.55<br>%         | 2.48<br>%  |
| <b>SNDF</b>                                            | 1.53<br>%       | 2.11<br>%        | 1.85<br>%        | 1.86<br>%         | 0.00<br>%  | 0.23<br>%       | 6.16<br>%        | 0.22<br>%        | 6.48<br>%         | 0.00<br>%       | 2.98<br>%       | 37.9<br>8%       | 2.29<br>%        | 36.2<br>8%        | 0.00<br>%  |
| <b>SNDX</b>                                            | 0.30<br>%       | 0.00<br>%        | 0.20<br>%        | 0.14<br>%         | 0.00<br>%  | 2.86<br>%       | 1.65<br>%        | 3.84<br>%        | 1.59<br>%         | 0.71<br>%       | 38.0<br>2%      | 1.97<br>%        | 43.3<br>2%       | 2.73<br>%         | 2.67<br>%  |
| <b>SNDXF</b>                                           | 0.49<br>%       | 1.27<br>%        | 1.33<br>%        | 2.02<br>%         | 0.00<br>%  | 0.04<br>%       | 5.18<br>%        | 0.10<br>%        | 8.38<br>%         | 0.00<br>%       | 3.23<br>%       | 36.2<br>0%       | 3.73<br>%        | 38.0<br>4%        | 0.00<br>%  |
| <b>SNI</b>                                             | 0.06<br>%       | 0.00<br>%        | 0.00<br>%        | 0.00<br>%         | 3.48<br>%  | 0.86<br>%       | 0.27<br>%        | 0.86<br>%        | 0.27<br>%         | 11.6<br>3%      | 1.05<br>%       | 0.12<br>%        | 1.39<br>%        | 0.18<br>%         | 79.8<br>3% |
| <b>Posteri<br/>or<br/>model<br/>probab<br/>ilities</b> | 44.1<br>9%      | 15.5<br>5%       | 34.3<br>5%       | 5.91<br>%         | 0.00<br>%  | 0.00<br>%       | 0.00<br>%        | 0.00<br>%        | 0.00<br>%         | 0.00<br>%       | 0.00<br>%       | 0.00<br>%        | 0.00<br>%        | 0.00<br>%         | 0.00<br>%  |

Confusion matrix for misclassification is reported here using DL for random samples from the models. Posterior model probabilities are final posterior after using the real data. ([B, M, S]x [No Introgression; Neanderthal and Denisova Introgression (ND); Neanderthal, Denisova and Africa

archaic introgression (NDX); Neanderthal, Denisova introgression and Farming Migration (NDF); Neanderthal, Denisova, African archaic introgression and Farming Migration (NDXF)]

Table S17: Cross validation and Model Selection with model SNDX and R.

|                                      | <b>BNDX</b> | <b>R</b> |
|--------------------------------------|-------------|----------|
| <b>BNDX</b>                          | 99.33%      | 0.67%    |
| <b>R</b>                             | 0.06%       | 99.94%   |
| <b>Posterior model probabilities</b> | 100.00%     | 0.00%    |

Confusion matrix for misclassification is reported here using SMC for random samples from the models. Posterior model probabilities are final posterior after using the real data.

Table S18: Posterior range of model B by DL.

| <b>Parameters</b>   | <b>Mean</b> | <b>2.5P</b> | <b>97.5P</b> |
|---------------------|-------------|-------------|--------------|
| <b>N_A</b>          | 16,846      | 14,956      | 23,610       |
| <b>N_AF</b>         | 75,043      | 28,330      | 145,659      |
| <b>N_EU</b>         | 65,155      | 25,858      | 139,288      |
| <b>N_AS</b>         | 89,766      | 35,529      | 147,301      |
| <b>N_EU0</b>        | 2,132       | 1,286       | 3,416        |
| <b>N_AS0</b>        | 1,181       | 829         | 1,809        |
| <b>N_BC</b>         | 22,215      | 7,162       | 38,199       |
| <b>N_B</b>          | 3,060       | 2,557       | 3,371        |
| <b>N_AF0</b>        | 19,484      | 7,372       | 37,748       |
| <b>T_DM (ky)</b>    | 16.0        | 10.1        | 24.4         |
| <b>T_EU_AS (ky)</b> | 19.8        | 8.8         | 29.6         |
| <b>T_NM(ky)</b>     | 6.9         | 4.9         | 10.2         |
| <b>T_XM (ky)</b>    | 28.0        | 6.9         | 63.4         |
| <b>T_Mix (ky)</b>   | 11.3        | 4.8         | 19.5         |
| <b>T_Sep (ky)</b>   | 14.4        | 6.3         | 24.5         |
| <b>T_B (ky)</b>     | 16.9        | 5.5         | 36.2         |
| <b>T_AF (ky)</b>    | 194.8       | 12.4        | 624.5        |
| <b>T_N_D (ky)</b>   | 403.5       | 331.1       | 446.2        |
| <b>T_H_A (ky)</b>   | 213.1       | 132.9       | 251.6        |
| <b>T_H_X (ky)</b>   | 568.2       | 450.6       | 699.5        |
| <b>Mix (%)</b>      | 48.05%      | 19.19%      | 61.19%       |
| <b>NMix (%)</b>     | 2.72%       | 2.22%       | 3.03%        |
| <b>DMix (%)</b>     | 0.34%       | 0.08%       | 0.58%        |
| <b>XMix (%)</b>     | 1.65%       | 0.01%       | 7.37%        |

2.5P is 2.5 percentile and 97.5P is 97.5 percentile of confidence interval for respective parameters. Ky means kilo or thousand years.

Table S19: Posterior range of model B using RF.

| <b>Parameters</b>   | <b>Mean</b> | <b>2.5P</b> | <b>97.5P</b> |
|---------------------|-------------|-------------|--------------|
| <b>N_A</b>          | 16,233      | 12,072      | 22,045       |
| <b>N_AF</b>         | 43,664      | 15,126      | 136,542      |
| <b>N_EU</b>         | 75,454      | 16,242      | 143,463      |
| <b>N_AS</b>         | 83,959      | 20,726      | 147,852      |
| <b>N_EU0</b>        | 3,154       | 1,469       | 4,892        |
| <b>N_AS0</b>        | 1,156       | 571         | 2,511        |
| <b>N_BC</b>         | 20,421      | 1,816       | 38,900       |
| <b>N_B</b>          | 4,049       | 2,580       | 4,944        |
| <b>N_AF0</b>        | 22,495      | 7,938       | 38,551       |
| <b>T_DM (ky)</b>    | 21.4        | 10.7        | 38.5         |
| <b>T_EU_AS (ky)</b> | 15.2        | 5.5         | 28.9         |
| <b>T_NM(ky)</b>     | 15.2        | 5.4         | 34.5         |
| <b>T_XM (ky)</b>    | 44.3        | 5.9         | 110.9        |
| <b>T_Mix (ky)</b>   | 23.8        | 5.8         | 47.5         |
| <b>T_Sep (ky)</b>   | 23.1        | 5.4         | 47.4         |
| <b>T_B (ky)</b>     | 32.8        | 5.6         | 99.8         |
| <b>T_AF (ky)</b>    | 347.1       | 17.6        | 684.8        |
| <b>T_N_D (ky)</b>   | 394.3       | 332.0       | 447.8        |
| <b>T_H_A (ky)</b>   | 188.0       | 121.6       | 247.9        |
| <b>T_H_X (ky)</b>   | 571.5       | 454.8       | 695.4        |
| <b>Mix (%)</b>      | 61.45%      | 16.33%      | 93.80%       |
| <b>NMix (%)</b>     | 2.33%       | 1.14%       | 2.99%        |
| <b>DMix (%)</b>     | 0.97%       | 0.08%       | 1.89%        |
| <b>XMix (%)</b>     | 5.49%       | 0.32%       | 9.80%        |

CI is the confidence interval of 2.5%-97.5% of respective parameters. Ky means kilo or thousand years.

Table S20: Posterior range for parameters of model B with bigger priors for archaic separation.

| <b>Parameters</b>   | <b>Mean</b> | <b>CI</b>       | <b>Events (kya)</b>      |
|---------------------|-------------|-----------------|--------------------------|
| <b>N_A</b>          | 14214       | 14200 - 14220   |                          |
| <b>N_AF</b>         | 38815       | 36275 - 43345   |                          |
| <b>N_EU</b>         | 44547       | 39591 - 51198   |                          |
| <b>N_AS</b>         | 111147      | 101701 - 126733 |                          |
| <b>N_EU0</b>        | 2459        | 2296 - 2674     |                          |
| <b>N_AS0</b>        | 821         | 799 - 851       |                          |
| <b>N_BC</b>         | 16451       | 12632 - 21066   |                          |
| <b>N_B</b>          | 2296        | 2242 - 2347     |                          |
| <b>N_AF0</b>        | 35353       | 34396 - 35875   |                          |
| <b>T_DM (ky)</b>    | 13.6        | 12.8 - 14.5     | 13.6 (12.8 - 14.5)       |
| <b>T_EU_AS (ky)</b> | 20.6        | 19.8 - 21.7     | 34.3 (33 - 35.5)         |
| <b>T_NM (ky)</b>    | 7.9         | 7.8 - 8.2       | 42.2 (40.9 - 43.5)       |
| <b>T_XM (ky)</b>    | 18.1        | 17.6 - 18.6     | 52.4 (51.1 - 53.8)       |
| <b>T_Mix (ky)</b>   | 18          | 17.5 - 18.5     | 52.3 (50.9 - 53.6)       |
| <b>T_Sep (ky)</b>   | 10.3        | 9.7 - 11        | 62.7 (61.2 - 64.2)       |
| <b>T_B (ky)</b>     | 14.5        | 14 - 14.8       | 77.2 (75.7 - 78.8)       |
| <b>T_AF (ky)</b>    | 215.4       | 214.5 - 215.8   | 292.7 (291 - 294.4)      |
| <b>T_N_D (ky)</b>   | 504.1       | 435.6 - 584.4   | 504.1 (435.6 - 584.4)    |
| <b>T_H_A (ky)</b>   | 373.6       | 309.5 - 456.6   | 877.7 (773.1 - 982.3)    |
| <b>T_H_X (ky)</b>   | 1073.7      | 1032.7 - 1117.5 | 1073.7 (1032.7 - 1117.5) |
| <b>Mix (%)</b>      | 94.4        | 93.26 – 94.99   |                          |
| <b>NMix (%)</b>     | 2.48        | 2.34 – 2.71     |                          |
| <b>DMix (%)</b>     | 0.45        | 0.4 – 0.48      |                          |
| <b>XMix (%)</b>     | 4.48        | 4.24 – 4.68     |                          |

CI is the confidence interval of 2.5%-97.5% of respective parameters. Ky means kilo years and kya means kilo or thousand years ago from now.

Table S21: Posterior range for parameters of model B with Farming migration (BNDXF).

| Parameters          | Mean    | CI              | Events (kya)          |
|---------------------|---------|-----------------|-----------------------|
| <b>N_A</b>          | 14,570  | 14545 - 14580   |                       |
| <b>N_AF</b>         | 22,592  | 22288 - 23440   |                       |
| <b>N_EU</b>         | 91,774  | 83804 - 99522   |                       |
| <b>N_AS</b>         | 111,255 | 104593 - 119038 |                       |
| <b>N_EU0</b>        | 1,811   | 1782 - 1863     |                       |
| <b>N_AS0</b>        | 771     | 758 - 788       |                       |
| <b>N_BC</b>         | 17,880  | 13522 - 19990   |                       |
| <b>N_B</b>          | 2,176   | 2165 - 2198     |                       |
| <b>N_AF0</b>        | 30,920  | 30380 - 31153   |                       |
| <b>T_FM (ky)</b>    | 3.4     | 2 - 4.9         | 3.4 (2 - 4.9)         |
| <b>T_FS (ky)</b>    | 4.6     | 0.4 - 9.7       | 8 (3.1 - 12.9)        |
| <b>T_DM (ky)</b>    | 15.0    | 14.6 - 15.4     | 15 (14.6 - 15.4)      |
| <b>T_EU_AS (ky)</b> | 17.2    | 16.8 - 17.7     | 32.2 (31.6 - 32.7)    |
| <b>T_NM (ky)</b>    | 5.4     | 5.2 - 5.7       | 37.5 (36.9 - 38.2)    |
| <b>T_XM (ky)</b>    | 17.1    | 16.7 - 17.3     | 49.3 (48.6 - 49.9)    |
| <b>T_Mix (ky)</b>   | 16.9    | 16.6 - 17.5     | 49.1 (48.4 - 49.9)    |
| <b>T_Sep (ky)</b>   | 10.0    | 9.7 - 10.6      | 59.2 (58.4 - 60)      |
| <b>T_B (ky)</b>     | 12.5    | 12 - 13         | 71.7 (70.7 - 72.6)    |
| <b>T_AF (ky)</b>    | 215.6   | 213.3 - 216.7   | 287.3 (285.4 - 289.2) |
| <b>T_N_D (ky)</b>   | 449.8   | 444.3 - 452.3   | 449.8 (444.3 - 452.3) |
| <b>T_H_A (ky)</b>   | 254.4   | 253.7 - 254.6   | 704.2 (700.1 - 708.2) |
| <b>T_H_X (ky)</b>   | 693.9   | 683.4 - 698.5   | 693.9 (683.4 - 698.5) |
| <b>Mix</b>          | 93.11   | 92.1 - 93.63    |                       |
| <b>NMix</b>         | 2.97    | 2.9 - 3         |                       |
| <b>DMix</b>         | 0.64    | 0.62 - 0.69     |                       |
| <b>XMix</b>         | 5.55    | 5.01 - 5.99     |                       |
| <b>FMix</b>         | 2.42    | 2.19 - 2.53     |                       |

CI is the confidence interval of 2.5%-97.5% of respective parameters. Ky means kilo years and kya means kilo or thousand years ago from now.

# Supplementary Methods

To make our results easier to reproduce, we are giving three sample codes which were used to produce three demographic models using msprime. These codes are also available in <https://github.com/mayukhmondal/ABC-DLS/blob/master/src/SFS/Demography.py>.

## Model S:

```
def SNDX(params, inds, length=1e6, mutation_rate=1.45e-8,
recombination_rate=1e-8, replicates=300):
    """
    This is the simple out of Africa model with Neanderthal to OOA
    population, Denisova or Unknown to East Asia and
    African archaic to African populations.
    :param params: all the parameters necessary for this model in a list or
    array format
        N_A: The ancestral effective population size
        N_AF: Modern effective population size of Africa population
        N_EU: Modern effective population size of European population
        N_AS: Modern effective population size of East Asian population
        N_EU0: Effective population size of European population before
    exponential growth.
        N_AS0: Effective population size of East Asian population before
    exponential growth.
        N_B: Effective population size of Out of Africa (OOA) populations
        T_DIntro: Time interval for introgression in East Asian from Denisova
    or Unknown from now. in kilo year ago
            (kya)
        T_EU_AS: Time interval for separation of European and East Asian from
    T_DIntro. in kya
        T_NIntro: Time interval for introgression in OOA from Neanderthal
    from T_EU_AS. in kya
        T_XIntro: Time interval for introgression in African population from
    African archaic from T_EU_AS. in kya
        T_B: Time interval for separation between Africa and OOA populations
    from maximum between T_NIntro and T_XIntro.
            in kya
        T_AF: Time interval for decrease of effective population size of
    African population to ancestral effective
            population size from T_B. in kya
        T_N_D: Time interval for separation between Neanderthal and Denisova
    or Unknwon from now. in kya
        T_H_A: Time interval for separation between Neanderthal and modern
    humans from T_N_D. in kya
        T_H_X: Time interval for separation between African archaic and
    modern humans from now. in kya
        nintro: the fraction of introgression happened to OOA populations.
        dintro: the fraction of introgression happened to East Asians
        xintro: the fraction of introgression happened to African populations
    :param inds: the number of haplotypes per populations for example
    (10,10,10)
```

```

:param length: the length of chromosome that has to be simulated. default
is 1mb region
:param mutation_rate: the amount of mutation rate. default is 1.45x10^-8
per generation per base
:param recombination_rate: the amount of recombination rate. default is
10^-8 per generation per base
:param replicates: the number of replicated of length chromosome. default
is 300
:return: will return the msprime simulations. which then can be used to
extract SFS
"""
(N_A, N_AF, N_EU, N_AS, N_EU0, N_AS0, N_B, T_DIntro, T_EU_AS, T_NIntro,
T_XIntro, T_B,
T_AF, T_N_D, T_H_A, T_H_X, nintro, dintro, xintro) = params
(n1, n2, n3) = inds
T_DIntro, T_EU_AS, T_NIntro, T_XIntro, T_B, T_AF, T_N_D, T_H_A, T_H_X =
numpy.array(
    [T_DIntro, T_EU_AS, T_NIntro, T_XIntro, T_B, T_AF, T_N_D, T_H_A,
T_H_X]) * (1e3 / 29.0)
AFR, EUR, ASN, NEA, DEN, XAF = 0, 1, 2, 3, 4, 5
events = {}
r_EU = (math.log(N_EU / N_EU0) / (T_DIntro + T_EU_AS))
r_AS = (math.log(N_AS / N_AS0) / (T_DIntro + T_EU_AS))
population_configurations = [
    msprime.PopulationConfiguration(
        sample_size=n1, initial_size=N_AF),
    msprime.PopulationConfiguration(
        sample_size=n2, initial_size=N_EU, growth_rate=r_EU),
    msprime.PopulationConfiguration(
        sample_size=n3, initial_size=N_AS, growth_rate=r_AS),
    msprime.PopulationConfiguration(
        sample_size=0, initial_size=N_A),
    msprime.PopulationConfiguration(
        sample_size=0, initial_size=N_A),
    msprime.PopulationConfiguration(
        sample_size=0, initial_size=N_A)]
# Denisova or unknown admixture
events['deni_intro_asn'] = T_DIntro
deni_intro_asn = [msprime.MassMigration(
    time=events['deni_intro_asn'], source=ASN, destination=DEN,
proportion=dintro)]
# CEU and CHB merge into B with rate changes at T_EU_AS
events['split_eu_as'] = events['deni_intro_asn'] + T_EU_AS
split_eu_as = [
    msprime.MassMigration(
        time=events['split_eu_as'], source=ASN, destination=EUR,
proportion=1.0),
    msprime.PopulationParametersChange(
        time=events['split_eu_as'], initial_size=N_B, growth_rate=0,
population_id=EUR)]
# introgression Nean
events['nean_intro_eur'] = T_NIntro + events['split_eu_as']
nean_intro_eur = [msprime.MassMigration(

```



```

        time=events['nean_intro_eur'], source=EUR, destination=NEA,
proportion=nintro)]
    # introgression XAFR
    events['xafr_intro_afr'] = T_XIntro + events['split_eu_as']
    xafr_intro_afr = [msprime.MassMigration(
        time=events['xafr_intro_afr'], source=AFR, destination=XAF,
proportion=xintro)]
    # Population B merges into YRI at T_B
    events['split_afr_ooa'] = max(events['nean_intro_eur'],
events['xafr_intro_afr']) + T_B
    split_afr_ooa = [
        msprime.MassMigration(
            time=events['split_afr_ooa'], source=EUR, destination=AFR,
proportion=1.0)]
    events['ancestral_size'] = events['split_afr_ooa'] + T_AF
    # Size changes to N_A at T_AF
    ancestral_size = [msprime.PopulationParametersChange(
        time=events['ancestral_size'], initial_size=N_A, population_id=AFR)]
    # Denisova or Unknown merging with Neanderthal
    events['neanderthal_denisova'] = T_N_D
    neanderthal_denisova = [msprime.MassMigration(
        time=events['neanderthal_denisova'], source=DEN, destination=NEA,
proportion=1.0),
        msprime.PopulationParametersChange(
            time=events['neanderthal_denisova'], initial_size=N_A,
population_id=NEA)]
    # Neanderthal merging with humans
    events['human_neanderthal'] = T_N_D + T_H_A
    human_neanderthal = [msprime.MassMigration(
        time=events['human_neanderthal'], source=NEA, destination=AFR,
proportion=1.0)]
    # XAFR merging with humans
    events['human_xafr'] = T_H_X
    human_xafr = [msprime.MassMigration(
        time=events['human_xafr'], source=XAF, destination=AFR,
proportion=1.0)]
    demographic_events = []
    for event in collections.OrderedDict(sorted(events.items(), key=lambda x:
x[1])).keys():
        demographic_events = demographic_events + eval(event)
    geno = msprime.simulate(
        population_configurations=population_configurations,
        demographic_events=demographic_events, length=length,
mutation_rate=mutation_rate,
        num_replicates=replicates,
        recombination_rate=recombination_rate)
    return geno

```

## Model B:

```
def BNDX(params, inds, length=1e6, mutation_rate=1.45e-8,
recombination_rate=1e-8, replicates=300):
    """
    This is the back to Africa model with Neanderthal to OOA population,
    Denisova or Unknown to East Asia and
    African archaic to African populations.
    :param params: all the parameters necessary for this model in a list or
    array format
        N_A: The ancestral effective population size
        N_AF1: Modern effective population size of Africa population
        N_EU: Modern effective population size of European population
        N_AS: Modern effective population size of East Asian population
        N_EU0: Effective population size of European population before
    exponential growth.
        N_AS0: Effective population size of East Asian population before
    exponential growth.
        N_BC: Effective population size of Back to Africa migrated
    population.
        N_B: Effective population size of Out of Africa (OOA) populations
        N_AF2: Effective population size of African populations before Back
    to Africa migration
        T_DIntro: Time interval for introgression in East Asian from Denisova
    or Unknown from now. in kilo year ago
            (kya)
        T_EU_AS: Time interval for separation of European and East Asian from
    T_DIntro. in kya
        T_NIntro: Time interval for introgression in OOA from Neanderthal
    from T_EU_AS. in kya
        T_XIntro: Time interval for introgression in African population from
    African archaic from T_EU_AS. in kya
        T_Mix: Time interval for mixing with Back to Africa population from
    T_EU_AS. in kya
        T_Sep: Time interval for separation of Back to Africa population from
    OOA from T_Mix. in kya
        T_B: Time interval for separation between Africa and OOA populations
    from maximum between T_NIntro, T_XIntro and
            T_Sep. in kya
        T_AF: Time interval for decrease of effective population size of
    African population to ancestral effective
            population size from T_B. in kya
        T_N_D: Time interval for separation between Neanderthal and Denisova
    or Unknwon from now. in kya
        T_H_A: Time interval for separation between Neanderthal and modern
    humans from T_N_D. in kya
        T_H_X: Time interval for separation between African archaic and
    modern humans from now. in kya
        mix: the fraction of African genome is replaced but Back to Africa
    population
        nintro: the fraction of introgression happened to OOA populations.
        dintro: the fraction of introgression happened to East Asians
        xintro: the fraction of introgression happened to African populations
```

```

:param inds: the number of haplotypes per populations for example
(10,10,10)
:param length: the length of chromosome that has to be simulated. default
is 1mb region
:param mutation_rate: the amount of mutation rate. default is 1.45x10^-8
per generation per base
:param recombination_rate: the amount of recombination rate. default is
10^-8 per generation per base
:param replicates: the number of replicated of length chromosome. default
is 300
:return: will return the msprime simulations. which then can be used to
extract SFS
"""
(N_A, N_AF1, N_EU, N_AS, N_EU0, N_AS0, N_BC, N_B, N_AF2, T_DIntro,
T_EU_AS, T_NIntro,
T_XIntro, T_Mix, T_Sep, T_B, T_AF, T_N_D, T_H_A, T_H_X, mix, nintro,
dintro,
xintro) = params
(n1, n2, n3) = inds
T_DIntro, T_EU_AS, T_NIntro, T_XIntro, T_Mix, T_Sep, T_B, T_AF, T_N_D,
T_H_A, T_H_X = numpy.array(
[T_DIntro, T_EU_AS, T_NIntro, T_XIntro, T_Mix, T_Sep, T_B, T_AF,
T_N_D, T_H_A, T_H_X]) * (1e3 / 29.0)
events = {}
AFR, EUR, ASN, GST, NEA, DEN, XAF = 0, 1, 2, 3, 4, 5, 6
r_EU = (math.log(N_EU / N_EU0) / (T_DIntro + T_EU_AS))
r_AS = (math.log(N_AS / N_AS0) / (T_DIntro + T_EU_AS))
# N_B=N_EU0+N_AS0
population_configurations = [
msprime.PopulationConfiguration(
sample_size=n1, initial_size=N_AF1),
msprime.PopulationConfiguration(
sample_size=n2, initial_size=N_EU, growth_rate=r_EU),
msprime.PopulationConfiguration(
sample_size=n3, initial_size=N_AS, growth_rate=r_AS),
msprime.PopulationConfiguration(
sample_size=0, initial_size=N_BC),
msprime.PopulationConfiguration(
sample_size=0, initial_size=N_A),
msprime.PopulationConfiguration(
sample_size=0, initial_size=N_A),
msprime.PopulationConfiguration(
sample_size=0, initial_size=N_A)
]
# Denisova or unknown admixture
events['deni_intro_asn'] = T_DIntro
deni_intro_asn = [msprime.MassMigration(
time=events['deni_intro_asn'], source=ASN, destination=DEN,
proportion=dintro)]
# CEU and CHB merge into B with rate changes at T_EU_AS
events['split_eu_as'] = events['deni_intro_asn'] + T_EU_AS
split_eu_as = [msprime.MassMigration(

```

```

        time=events['split_eu_as'], source=ASN, destination=EUR,
proportion=1.0),
        msprime.PopulationParametersChange(
            time=events['split_eu_as'], initial_size=N_B, growth_rate=0,
population_id=EUR),
        msprime.MigrationRateChange(time=events['split_eu_as'], rate=0)]
# introgression
events['nean_intro_eur'] = T_NIntro + events['split_eu_as']
nean_intro_eur = [msprime.MassMigration(
    time=events['nean_intro_eur'], source=EUR, destination=NEA,
proportion=nintro)]
# introgression XAFR
events['xafr_intro_afr'] = T_XIntro + events['split_eu_as']
xafr_intro_afr = [msprime.MassMigration(
    time=events['xafr_intro_afr'], source=AFR, destination=XAF,
proportion=xintro)]
# back migration
events['back_migration'] = events['split_eu_as'] + T_Mix
back_migration = [msprime.MassMigration(time=events['back_migration'],
source=AFR,
                                destination=GST, proportion=mix),
msprime.PopulationParametersChange(
    time=events['back_migration'], initial_size=N_AF2,
population_id=AFR)]
# separation between back and OOA
events['split_ooa_back'] = events['back_migration'] + T_Sep
split_ooa_back = [msprime.MassMigration(time=events['split_ooa_back'],
source=GST,
                                destination=EUR, proportion=1.0)]

# Population B merges into YRI at T_B
events['split_afr_ooa'] = max(events['split_ooa_back'],
events['xafr_intro_afr'],
                                events['nean_intro_eur']) + T_B
split_afr_ooa = [msprime.MassMigration(
    time=events['split_afr_ooa'], source=EUR, destination=AFR,
proportion=1.0),
        msprime.MigrationRateChange(time=events['split_afr_ooa'], rate=0)]
# Size changes to N_A at T_AF
events['ancestral_size'] = events['split_afr_ooa'] + T_AF
ancestral_size = [msprime.PopulationParametersChange(
    time=events['ancestral_size'], initial_size=N_A, population_id=AFR)]
# Denisova or Unknwon merging with Neanderthal
events['neanderthal_denisova'] = T_N_D
neanderthal_denisova = [msprime.MassMigration(
    time=events['neanderthal_denisova'], source=DEN, destination=NEA,
proportion=1.0),
        msprime.PopulationParametersChange(
            time=events['neanderthal_denisova'], initial_size=N_A,
population_id=NEA)]
# Neanderthal merging with humans
events['human_neanderthal'] = T_N_D + T_H_A
human_neanderthal = [msprime.MassMigration(

```

```

        time=events['human_neanderthal'], source=NEA, destination=AFR,
proportion=1.0]
    # XAFR merging with humans
    events['human_xafr'] = T_H_X
    human_xafr = [msprime.MassMigration(
        time=events['human_xafr'], source=XAF, destination=AFR,
proportion=1.0)]
    demographic_events = []
    for event in collections.OrderedDict(sorted(events.items(), key=lambda x:
x[1])).keys():
        demographic_events = demographic_events + eval(event)
    geno = msprime.simulate(
        population_configurations=population_configurations,
        demographic_events=demographic_events, length=length,
mutation_rate=mutation_rate,
        num_replicates=replicates,
        recombination_rate=recombination_rate)
    return geno

```

## Model M:

```
def MNDX(params, inds, length=1e6, mutation_rate=1.45e-8,
recombination_rate=1e-8, replicates=300):
    """
        This is the mix OOA model with Neanderthal to OOA population,
        Denisova or Unknown to East Asia and
        African archaic to African populations.
        :param params: all the parameters necessary for this model in a list
        or array format
        N_A: The ancestral effective population size
        N_AF: Modern effective population size of Africa population
        N_EU: Modern effective population size of European population
        N_AS: Modern effective population size of East Asian population
        N_EU0: Effective population size of European population before
        exponential growth.
        N_AS0: Effective population size of East Asian population before
        exponential growth.
        N_MX: Effective population size of Mix to OOA population (assume
        second OOA).
        N_B1: Effective population size of Out of Africa (OOA)
        populations after admixture with mix population
        N_B2: Effective population size of Out of Africa before admixture
        (assume first OOA).
        T_DIntro: Time interval for introgression in East Asian from
        Denisova or Unknown from now. in kilo year ago
        (kya)
        T_EU_AS: Time interval for separation of European and East Asian
        from T_DIntro. in kya
        T_NIntro: Time interval for introgression in OOA from Neanderthal
        from T_EU_AS. in kya
        T_XIntro: Time interval for introgression in African population
        from African archaic from T_EU_AS. in kya
        T_Mix: Time interval for mixing between OOA (OOA_1) and Mix
        (OOA_2) from T_EU_AS. in kya
        T_Sep: Time interval for separation of Mix population from Africa
        from T_Mix. in kya
        T_B: Time interval for separation between Africa and OOA
        populations from maximum between T_NIntro, T_XIntro
        and T_Sep. in kya
        T_AF: Time interval for decrease of effective population size of
        African population to ancestral effective
        population size from T_B. in kya
        T_N_D: Time interval for separation between Neanderthal and
        Denisova or Unknown from now. in kya
        T_H_A: Time interval for separation between Neanderthal and
        modern humans from T_N_D. in kya
        T_H_X: Time interval for separation between African archaic and
        modern humans from now. in kya
        mix: the fraction of OOA (OOA_1) genome is replaced but Mix
        population (OOA_2)
        nintro: the fraction of introgression happened to OOA
        populations.
```

```

        dintro: the fraction of introgression happened to East Asians
        xintro: the fraction of introgression happened to African
populations
        :param inds: the number of haplotypes per populations for example
(10,10,10)
        :param length: the length of chromosome that has to be simulated.
default is 1mb region
        :param mutation_rate: the amount of mutation rate. default is
1.45x10^-8 per generation per base
        :param recombination_rate: the amount of recombination rate. default
is 10^-8 per generation per base
        :param replicates: the number of replicated of length chromosome.
default is 300
        :return: will return the msprime simulations. which then can be used
to extract SFS
"""
    (N_A, N_AF, N_EU, N_AS, N_EU0, N_AS0, N_MX, N_B1, N_B2, T_DIntro,
T_EU_AS,
    T_NIntro, T_XIntro, T_Mix, T_Sep, T_B, T_AF, T_N_D, T_H_A, T_H_X, mix,
nintro,
    dintro, xintro) = params
    (n1, n2, n3) = inds
    T_DIntro, T_EU_AS, T_NIntro, T_XIntro, T_Mix, T_Sep, T_B, T_AF, T_N_D,
T_H_A, T_H_X = numpy.array(
    [T_DIntro, T_EU_AS, T_NIntro, T_XIntro, T_Mix, T_Sep, T_B, T_AF,
T_N_D, T_H_A, T_H_X]) * (1e3 / 29.0)
    events = {}
    AFR, EUR, ASN, GST, NEA, DEN, XAF = 0, 1, 2, 3, 4, 5, 6
    r_EU = (math.log(N_EU / N_EU0) / (T_DIntro + T_EU_AS))
    r_AS = (math.log(N_AS / N_AS0) / (T_DIntro + T_EU_AS))
    # N_B=N_EU0+N_AS0
    population_configurations = [
        msprime.PopulationConfiguration(
            sample_size=n1, initial_size=N_AF),
        msprime.PopulationConfiguration(
            sample_size=n2, initial_size=N_EU, growth_rate=r_EU),
        msprime.PopulationConfiguration(
            sample_size=n3, initial_size=N_AS, growth_rate=r_AS),
        msprime.PopulationConfiguration(
            sample_size=0, initial_size=N_MX),
        msprime.PopulationConfiguration(
            sample_size=0, initial_size=N_A),
        msprime.PopulationConfiguration(
            sample_size=0, initial_size=N_A),
        msprime.PopulationConfiguration(
            sample_size=0, initial_size=N_A) ]
    # Denisova or unknown admixture
    events['deni_intro_asn'] = T_DIntro
    deni_intro_asn = [msprime.MassMigration(
        time=events['deni_intro_asn'], source=ASN, destination=DEN,
proportion=dintro)]
    # CEU and CHB merge into B with rate changes at T_EU_AS
    events['split_eu_as'] = events['deni_intro_asn'] + T_EU_AS

```

```

split_eu_as = [msprime.MassMigration(
    time=events['split_eu_as'], source=ASN, destination=EUR,
proportion=1.0),
    msprime.PopulationParametersChange(
        time=events['split_eu_as'], initial_size=N_B1, growth_rate=0,
population_id=EUR),
    msprime.MigrationRateChange(time=events['split_eu_as'], rate=0)]
# NEAN introgression
events['nean_intro_eur'] = T_NIntro + events['split_eu_as']
nean_intro_eur = [msprime.MassMigration(
    time=events['nean_intro_eur'], source=EUR, destination=NEA,
proportion=nintro)]
# introgression XAFR
events['xafr_intro_afr'] = T_XIntro + events['split_eu_as']
xafr_intro_afr = [msprime.MassMigration(
    time=events['xafr_intro_afr'], source=AFR, destination=XAF,
proportion=xintro)]
# mix migration
events['mix_migration'] = T_Mix + events['split_eu_as']
mix_migration = [msprime.MassMigration(time=events['mix_migration'],
source=EUR,
                                destination=GST, proportion=mix),
msprime.PopulationParametersChange(
    time=events['mix_migration'], initial_size=N_B2, population_id=EUR)]
# separation between back and OOA
events['split_afr_mix'] = events['mix_migration'] + T_Sep
split_afr_mix = [msprime.MassMigration(time=events['split_afr_mix'],
source=GST,
                                destination=AFR, proportion=1.0)]

# Population B merges into YRI at T_B
events['split_afr_ooa'] = max(events['split_afr_mix'],
events['xafr_intro_afr'], events['nean_intro_eur']) + T_B
split_afr_ooa = [msprime.MassMigration(
    time=events['split_afr_ooa'], source=EUR, destination=AFR,
proportion=1.0),
    msprime.MigrationRateChange(time=events['split_afr_ooa'], rate=0)]
# Size changes to N_A at T_AF
events['ancestral_size'] = events['split_afr_ooa'] + T_AF
ancestral_size = [msprime.PopulationParametersChange(
    time=events['ancestral_size'], initial_size=N_A, population_id=AFR)]
# Denisova or Unknwon merging with Neanderthal
events['neanderthal_denisova'] = T_N_D
neanderthal_denisova = [msprime.MassMigration(
    time=events['neanderthal_denisova'], source=DEN, destination=NEA,
proportion=1.0),
    msprime.PopulationParametersChange(
        time=events['neanderthal_denisova'], initial_size=N_A,
population_id=NEA)]
# Neanderthal merging with humans
events['human_neanderthal'] = T_N_D + T_H_A
human_neanderthal = [msprime.MassMigration(
    time=events['human_neanderthal'], source=NEA, destination=AFR,
proportion=1.0)]

```



```

# XAFR merging with humans
events['human_xafr'] = T_H_X
human_xafr = [msprime.MassMigration(
    time=events['human_xafr'], source=XAF, destination=AFR,
proportion=1.0)]
demographic_events = []
for event in collections.OrderedDict(sorted(events.items(), key=lambda x:
x[1])).keys():
    demographic_events = demographic_events + eval(event)
    geno = msprime.simulate(
        population_configurations=population_configurations,
        demographic_events=demographic_events, length=length,
mutation_rate=mutation_rate,
        num_replicates=replicates,
        recombination_rate=recombination_rate)
return geno

```
